# Supplementary material
Source: ML conference proceedings conference paper supplement (https://openreview.net/forum?id=IMamKWkS1s)
Supplement: supplementary_material [file NeurIPS2025_DPPO.pdf › NeurIPS2025_DPPO.pdf]

---

# On the Sample Complexity of Differentially Private Policy Optimization

---

Anonymous Author(s)

Affiliation

Address

email

## Abstract

1 Policy optimization (PO) is a cornerstone of modern reinforcement learning (RL),  
2 with diverse applications spanning robotics, healthcare, and large language model  
3 training. The increasing deployment of PO in sensitive domains, however, raises  
4 significant privacy concerns. In this paper, we initiate a theoretical study of differ-  
5 entially private policy optimization, focusing explicitly on its sample complexity.  
6 We first formalize an appropriate definition of differential privacy (DP) tailored to  
7 PO, addressing the inherent challenges arising from on-policy learning dynamics  
8 and the subtlety involved in defining the unit of privacy. We then systematically  
9 analyze the sample complexity of widely-used PO algorithms, including policy  
10 gradient (PG), natural policy gradient (NPG) and more, under DP constraints and  
11 various settings, via a unified framework. Our theoretical results demonstrate that  
12 privacy costs can often manifest as lower-order terms in the sample complexity,  
13 while also highlighting subtle yet important observations in private PO settings.  
14 These offer valuable practical insights for privacy-preserving PO algorithms.

## 15 1 Introduction

16 Policy Optimization (PO) such as REINFORCE [1, 2], proximal policy optimization (PPO) [3]  
17 and group relative policy optimization (GRPO) [4] has gained increasing interest across  
18 various applications. Due to its popularity, there is a rich literature that provides various theoretical  
19 understandings of different PO methods (e.g., iteration or sample complexity [5–8]).

20 As PO becomes increasingly prevalent in real-world applications, privacy concerns are emerging as a  
21 critical challenge. For instance, in personalized medical care, patient interactions—where the state  
22 represents medical history, the action corresponds to prescribed medication, and the reward reflects  
23 treatment effectiveness—constitute sensitive data that must be protected. Similarly, in RL-based  
24 training of large language models (LLMs), user prompts may contain private information that requires  
25 protection. Addressing these privacy concerns is essential for ensuring the responsible deployment of  
26 PO methods in sensitive domains.

27 **Contribution.** In this paper, we initiate the theoretical study of differentially private policy optimiza-  
28 tion, focusing on the central question: *What’s the sample complexity cost induced by differential*  
29 *privacy in PO?* To this end, we first carefully define a suitable notion of differential privacy (DP) [9]  
30 for PO, highlighting its distinctions from the standard DP definitions used in supervised learning.  
31 These differences stem from the unique learning dynamics and the notion of the privacy unit in PO.  
32 Then, we propose a meta algorithm for private PO, which enables us to study private policy gradient  
33 with REINFORCE (DP-PG), private natural policy gradient (NPG) [10] (DP-NPG), and private version  
34 of REBEL recently proposed in [11] (DP-REBEL) in a unified perspective. Moreover, for DP-NPG and  
35 DP-REBEL, we further reduce PO to a sequence of private regression problems, thus allowing us to

leverage various well-established results in private estimation and supervised learning. Throughout this process, we not only highlight the difference between DP-PG and DP-NPG, but also uncover some subtleties when applying private regression results within the current analytical framework of PO. The key takeaway from our theoretical results is that the privacy cost can often appear as lower-order terms in the overall sample complexity. Meanwhile, it is worth noting that structural properties of the underlying problem can further improve both statistical and computational efficiency.

**Related work.** We mainly discuss the most relevant work here and relegate a detailed discussion to Appendix A. The very recent work [12] studies private PG, but mainly from an empirical perspective without sample complexity bounds. From the online regret perspective, optimistic PPO has been studied in the tabular case [13] and linear case [14], respectively. In contrast, we aim to consider general function classes from the optimization perspective. We also note that NPG with a softmax or log-linear policy is equivalent to PPO. The authors of [15] study private policy evaluation, which aims to evaluate a given policy rather than finding the best policy in policy optimization. From an application perspective, [16] applies private PPO for LLM alignment via reinforcement learning from human feedback (RLHF).

## 2 Preliminaries

**Policy optimization (PO).** In this work, instead of considering a general Markov decision process (MDP), we focus on the simpler bandit formulation, which allows us to easily demonstrate the key ideas. We note that generalizing it to MDP is standard, as done in the literature [6, 17]. This bandit formulation already captures many interesting real-world applications, such as personalized medical care [18] and alignment/reasoning training in large language models (LLMs) [19]. In particular, given an initial state  $x \in \mathcal{X}$  (e.g., a medical status or a prompt in LLMs) sampled from a distribution  $\rho$ , an action  $y \in \mathcal{Y}$  (e.g., a medical prescription or a response in LLMs) is generated according to a policy  $\pi$  and a reward  $r(x, y) \in [-R_{\max}, R_{\max}]$  is observed. In policy optimization, we parameterize the policy  $\pi$  by  $\pi_\theta$  with  $\theta \in \Theta = \mathbb{R}^d$  (e.g., a neural network), and the goal is to leverage interactions (e.g., sample trajectories) to find an optimal policy that maximizes the following objective:

$$J(\pi_\theta) = J(\theta) := \mathbb{E}_{x \sim \rho, y \sim \pi_\theta(\cdot|x)} [r(x, y)].$$

**Vanilla policy gradient (PG).** One simple and direct approach to solving the above policy optimization problem is via vanilla policy gradient, i.e.,  $\theta_{t+1} = \theta_t + \eta \nabla J(\theta_t)$ , where  $\eta > 0$  is some learning rate,  $\nabla J(\theta_t)$  is the gradient at step  $t$ , and  $\theta_1$  is some initial value. The gradient can be written as follows by the classic policy gradient theorem

$$\nabla J(\theta) = \mathbb{E}_{x \sim \rho, y \sim \pi_\theta(\cdot|x)} [A^{\pi_\theta}(x, y) \nabla_\theta \log \pi_\theta(y|x)], \quad (1)$$

where  $A^{\pi_\theta}(x, y) := r(x, y) - \mathbb{E}_{y' \sim \pi_\theta(y'|x)} r(x, y')$  is the advantage function.

**Natural policy gradient (NPG).** Another approach to solving the PO problem is natural policy gradient (NPG) [10], which uses the Fisher information matrix as the preconditioner to account for the geometry. Specifically, the NPG update is given by  $\theta_{t+1} = \theta_t + \eta F_\rho^\dagger(\theta_t) \nabla J(\theta_t)$ , where  $F_\rho(\theta) := \mathbb{E}_{x \sim \rho, y \sim \pi_\theta(\cdot|x)} [\nabla_\theta \log \pi_\theta(y|x) \log \pi_\theta(y|x)^\top]$  is the expected Fisher information matrix (with superscript  $\dagger$  being the Moore-Penrose pseudoinver) and  $\nabla J(\theta_t)$  is the same as before. An equivalent way to write the above update is the following [5]

$$\theta_{t+1} = \theta_t + \eta \cdot w_t, w_t \in \underset{w}{\operatorname{argmin}} \mathbb{E}_{x \sim \rho, y \sim \pi_{\theta_t}(\cdot|x)} \left[ \left( A^{\pi_{\theta_t}}(x, y) - w^\top \nabla \log \pi_{\theta_t}(y|x) \right)^2 \right], \quad (2)$$

which essentially reduces PO to a sequence of regression problems.

**Regression to Relative Reward Based RL (REBEL).** Recently, a simple and scalable PO algorithm called REBEL is proposed in [11], which also reduces PO to a sequence of regression problems, but now over *relative reward difference*, motivated from the DPO-style reparameterization trick in [20]. In the expected form, the update under REBEL is given by

$$\theta_{t+1} = \underset{\theta}{\operatorname{argmin}} \mathbb{E} \left[ \frac{1}{\eta} \left( \ln \frac{\pi_\theta(y|x)}{\pi_{\theta_t}(y|x)} - \ln \frac{\pi_\theta(y'|x)}{\pi_{\theta_t}(y'|x)} \right) - (r(x, y) - r(x, y')) \right]^2, \quad (3)$$

where the expectation here is over  $x \sim \rho, y \sim \mu(\cdot|x), y' \sim \pi_{\theta_t}(\cdot|x)$ , and  $\mu$  can be either on-policy distribution  $\pi_{\theta_t}$  or any offline reference policy.

**Sample complexity.** All the aforementioned ideal policy updates (e.g., full gradient) involve expectation, which is often difficult to compute in practice due to both statistical (e.g., without knowing  $\rho$ ) and computational (e.g., averaging over all possible trajectories) issues. Thus, one needs to replace the expectation with a sample-based estimate by sampling a dataset of trajectories at each iteration from an underlying distribution. The sample complexity typically refers to the total number of sampled trajectories for finding an  $\alpha$ -optimal policy (i.e.,  $J(\pi^*) - J(\hat{\pi}) \leq \alpha$ ).

In this paper, our ultimate goal is to formally introduce differential privacy (DP) into the problem of policy optimization and derive the sample complexity bounds under privacy constraints. To this end, we need to carefully define both privacy and samples in the private case, as discussed next.

### 3 Differential Privacy in Policy Optimization

In this section, we formally introduce DP to PO, highlighting some subtleties compared with standard DP in supervised learning problems. We first recall the standard DP definition with a *fixed* dataset.

**Definition 1** (Dwork et al. [9]). A randomized mechanism  $\mathcal{M}$  satisfies  $(\varepsilon, \delta)$ -DP if for any adjacent datasets  $D, D'$  differing by one record, and  $\forall S \subseteq \text{Range}(\mathcal{M})$ :

$$\mathbb{P}[\mathcal{M}(D) \in S] \leq e^\varepsilon \cdot \mathbb{P}[\mathcal{M}(D') \in S] + \delta.$$

This standard DP notion can be directly used in supervised learning problems with  $D$  being a set of i.i.d samples  $\{(x_i, y_i)\}_{i=1}^N$  from an unknown distribution and  $\mathcal{M}(D)$  being the final model. This has been utilized in private empirical risk minimization (ERM) [21, 22] as well as private stochastic optimization (both convex and non-convex), e.g., Bassily et al. [23]. For example, the optimal excess population risk for stochastic convex optimization is  $O_\delta(1/\sqrt{N} + \sqrt{d}/(N\varepsilon))$  for  $(\varepsilon, \delta)$ -DP, where  $d$  is the dimension of the parameter space.

One may attempt to adopt the above notion directly to PO with the dataset  $D$  being  $\{(x_i, y_i)\}_{i=1}^N$  and  $\mathcal{M}(D)$  being the final policy. However, this does not make too much sense because (i) there is no such a *fixed* dataset in PO as the actions are often sampled in the on-policy fashion, i.e., using the most recent policy; (ii) the neighboring relation of differing in one sample  $(x_i, y_i)$  (i.e., privacy unit) actually does not hold as changing one sample will lead to difference in all future samples due to different policies onward. Thus, we need a new definition that can address the above two issues. Before proceeding, we consider two motivating examples to illustrate the subtlety.

**Example 1** (SFT vs. RL fine-tuning in LLMs). Consider a reasoning task in LLMs. With supervised fine-tuning (SFT), we are given a fixed dataset of pairs  $\{(x_i, y_i)\}_{i=1}^N$  where  $x_i$  is the prompt/question and  $y_i$  is the correct answer. Standard DP is natural here, which ensures that changing one sample  $(x_i, y_i)$  will not change the final policy too much. On the other hand, if one uses RL (e.g., PPO) to do the fine-tuning, then the given dataset consists of only prompts, as the answers are generated on the fly. So, a proper privacy unit here is to protect each prompt in the sense that changing one prompt will not change the policy too much.

**Example 2** (Supervised learning vs. RL for healthcare). In this case, to train a healthcare system, one can use a supervised learning approach by collecting a dataset of  $\{(x_i, y_i)\}_{i=1}^N$  where  $x_i$  is the medical status and  $y_i$  is the recommended medicine. One can also adopt an RL approach (even in an online manner) where the dataset consists of a (stream) set of users/patients, each with a medical status  $x_i$  sampled from a distribution  $\rho$ , while the recommendation  $y_i$  can only be determined on the fly. The privacy protection is that changing one user/patient will not change the final policy too much.

To handle both scenarios, we borrow the idea from private online bandit and RL literature [24, 13], which essentially considers a set of “users” as the dataset. For instance, the dataset could be  $N$  unique patients interacting with the learning agent, and each user has an initial state (e.g., medical status), which is distributed according to  $\rho$ . We can fix the “users” in advance (or arrive online) and the privacy unit is now for each patient, hence resolving both issues above. Meanwhile, the set of “users” can also represent  $N$  (static) prompts in the fine-tuning of LLMs, with each “user” contributing one prompt. Note that although we use “users” to align with personalization application, this is still an item-level DP, as each “user” appears only once (as a patient or prompt). The learning agent can interact with each “user” to observe  $(x, y)$  and  $r(x, y)$  *dynamically*, i.e., on-the-fly. With the above notion of dataset, the privacy protection in PO is that changing one “user” in the dataset will not change the final policy too much, leading to the following definition.

131 **Definition 2** (DP in PO). Consider any policy optimization algorithm  $\mathcal{M}$  interacting with a set  $D$   
 132 of  $N$  “users” and  $\mathcal{M}(D)$  being the final output policy. We say  $\mathcal{M}$  is  $(\varepsilon, \delta)$ -DP if for any adjacent  
 133 datasets  $D, D'$  differing by one “user”, and  $\forall S \subseteq \text{Range}(\mathcal{M})$ :

$$\mathbb{P}[\mathcal{M}(D) \in S] \leq e^\varepsilon \cdot \mathbb{P}[\mathcal{M}(D') \in S] + \delta.$$

134 *Remark 1.* We emphasize that the above DP notion is defined for the problem PO rather than for a  
 135 specific algorithm, analogous to the standard DP in statistical learning (e.g., supervised learning). In  
 136 this paper, we aim to design some private variants of PO methods (DP-PG, DP-NPG, DP-REBEL) and  
 137 analyze their sample complexity under the above privacy constraint.

## 138 4 A Meta Algorithm for Private PO

139 In this section, we present a meta algorithm for private PO, which builds upon a unified view of PG,  
 140 NPG, and REBEL. We believe that this meta viewpoint is also interesting in the non-private case.

141 Our meta algorithm is given by Algorithm 1, which is essentially a batched one-pass algorithm. In  
 142 particular, at each iteration  $t$ , the learner collects  $m$  fresh samples by sampling from a distribution  
 143 over  $x$  and  $y$ . To be more specific, one can view each sample  $(x_i, y_i, y'_i)$  as generated via interaction  
 144 with a new fresh “user”, which provides the context/prompt  $x_i$ . Then, leveraging the dataset  $D_t$  and a  
 145 specific PrivUpdate oracle, the learner finds the next policy iteratively.

---

### Algorithm 1 A Meta Algorithm

---

- 1: **Input:** reward  $r$ , learning rate  $\eta$ , batch size  $m$ , and policy class  $\pi_\theta$ , PrivUpdate oracle, base policy  $\mu$
  - 2: Initialize  $\theta_1 = 0$
  - 3: **for**  $t=1, \dots, T$  **do**
  - 4:   Collect a *fresh* dataset  $\bar{D}_t = \{(x_i, y_i, y'_i)\}_{i=1}^m$  of size  $m$  using the  $\pi_{\theta_t}$  and  $\mu$ :  

$$x_i \sim \rho, y_i \sim \mu(\cdot | x_i), y'_i \sim \pi_{\theta_t}(\cdot | x_i)$$
  - 5:   For all  $i \in [m]$ , let  $\hat{A}_t(x_i, y_i) := r(x_i, y_i) - r(x_i, y'_i)$  be the estimate of  $A^{\pi_{\theta_t}}(x_i, y_i)$
  - 6:   Call a PrivUpdate oracle on  $D_t := \{(x_i, y_i, y'_i, \hat{A}_t(x_i, y_i))\}_{i=1}^m$  to find next policy  $\theta_{t+1}$
  - 7: **end for**
- 

146 Under this one-pass algorithm design, we naturally have the following privacy guarantee, connecting  
 147 standard DP (Definition 1) with DP in PO (Definition 2).

148 **Proposition 1.** Suppose PrivUpdate satisfies  $(\varepsilon, \delta)$ -DP under Definition 1, then Algorithm 1 satisfies  
 149  $(\varepsilon, \delta)$ -DP in terms of Definition 2.

150 This simply follows from our one-pass algorithm and (adaptive) parallel composition of DP, by noting  
 151 that changing one “user” would only change one record in  $D_t$  of a single  $t \in [T]$ .

152 *Remark 2.* Our meta algorithm can also be used in the online setting where a stream of  $N$  “users”  
 153 arrive sequentially. By the so-called *billboard lemma* [25], our meta algorithm also satisfies the  
 154 commonly used *joint differential privacy* (JDP) in the literature of private online RL/bandits [24, 26,  
 155 13, 14, 27]. Roughly speaking, JDP guarantees that changing one “user” (say  $u$ ) will not change all  
 156 the actions prescribed to all other “users” except  $u$ , as well as the final policy.

157 For sample complexity, due to the batched one-pass algorithm over  $N$  unique “users”, the total  
 158 number of sampled trajectories is simply  $N = m \cdot T$ , where each trajectory  $(x_i, y_i, y'_i)$  is from a  
 159 fresh user. To put it in another way, for a fixed  $N$ , the key here is to balance between batch size  $m$   
 160 and number of iterations  $T$  so as to balance between the per-iteration accuracy and the total number  
 161 of updates. This balance, in turn, depends on the specific choice of PrivUpdate oracle, which will  
 162 be instantiated in the next sections for DP-PG, DP-NPG, DP-REBEL, respectively.

## 163 5 Differentially Private Policy Gradient

164 In this section, we propose DP-PG by building upon our meta algorithm and analyze its sample  
 165 complexity bounds under different settings.

Our proposed DP-PG is Algorithm 1 with the instantiation of PrivUpdate as in Algorithm 2 below. In particular, it first computes an unbiased REINFORCE-style estimate (i.e.,  $\widehat{\nabla}_m J(\theta)$ ) of the full gradient  $\nabla J(\theta_t)$  as in (1), using the  $m$  trajectories in  $D_t$ . Then, a Gaussian noise is added with  $\sigma^2$  depending on the privacy parameters of  $\varepsilon$  and  $\delta$ . Finally,  $\theta_{t+1}$  is obtained by updating the current policy  $\theta_t$  along the direction of  $\widehat{g}_t$ , scaled by a properly chosen learning rate  $\eta$ .

---

**Algorithm 2** PrivUpdate Instantiation for DP-PG

---

- 1: **Input:** dataset  $D_t = \{(x_i, y_i, \widehat{A}_t(x_i, y_i))\}_{i=1}^m$ , policy  $\theta_t$ , learning rate  $\eta$ , noise scale  $\sigma$
- 2: **Output:**  $\theta_{t+1}$
- 3: Compute gradient:

$$\widehat{\nabla}_m J(\theta) := \frac{1}{m} \sum_{i=1}^m \nabla_{\theta} \log \pi_{\theta_t}(y_i | x_i) \cdot \widehat{A}_t(x_i, y_i)$$

- 4: Add noise:  $\widehat{g}_t := \widehat{\nabla}_m J(\theta) + \mathcal{N}(0, \sigma^2 I)$
  - 5: Output policy:  $\theta_{t+1} = \theta_t + \eta \cdot \widehat{g}_t$
- 

By the standard Gaussian mechanism [28] and Proposition 1, we have the following privacy guarantee.

**Theorem 1** (Privacy guarantee). *Assume for any  $x \in \mathcal{X}$  and  $\theta \in \Theta$ , there exists a constant  $G$  such that  $\|\nabla_{\theta} \log \pi_{\theta}(y | x)\| \leq G$ . Then, setting  $\sigma^2 = \frac{16 \log(1.25/\delta) R_{\max}^2 G^2}{m^2 \varepsilon^2}$  in Algorithm 2 ensures that DP-PG satisfies  $(\varepsilon, \delta)$ -DP as in Definition 2.*

The boundedness assumption of  $G$  is satisfied by softmax policy as well as Gaussian policy [6]. In fact, they satisfy an even stronger condition in Assumption 1, to be discussed shortly.

Next, we aim to establish the sample complexity results of our DP-PG with Algorithm 2 for both first-order stationary point (FOSP) and global optimum convergence, respectively.

### 5.1 First-order Stationary Point Convergence

We start with the sample complexity bound for FOSP convergence. This result is not only of its own importance, but will also be useful for our later results on the global optimum convergence. We will consider the following general class of policies, which is widely studied in previous non-private work and also includes commonly used policies such as softmax and Gaussian policy [6].

**Assumption 1** (Lipschitz Smoothness (LS)). There exist constants  $G, F > 0$  such that for every state  $x \in \mathcal{X}$ , the gradient and Hessian of  $\log \pi_{\theta}(\cdot | x)$  of any  $\theta \in \Theta$  satisfy

$$\|\nabla_{\theta} \log \pi_{\theta}(y|x)\| \leq G \text{ and } \|\nabla_{\theta}^2 \log \pi_{\theta}(y|x)\| \leq F.$$

*Remark 3.* For simplicity, as in previous work, we will often view  $G$  and  $F$  as constants  $\Theta(1)$ , hence omitted in the sample complexity bound. Moreover, we omit  $\log(1/\delta)$  term by writing  $O_{\delta}(\cdot)$ .

**Theorem 2** (FOSP convergence). *Under the same setting of Theorem 1 and Assumption 1, there exists a proper parameter choices of  $m$  and  $\eta$ , such that DP-PG achieves*

$$\mathbb{E} [\|\nabla J(\theta_U)\|^2] \leq O_{\delta} \left( \frac{1}{\sqrt{N}} + \left( \frac{\sqrt{d}}{N\varepsilon} \right)^{2/3} \right), \quad (4)$$

where  $\theta_U$  is uniformly sampled from  $\{\theta_1, \dots, \theta_T\}$ .

*Remark 4.* We can see that the first term in (4) matches the previous non-private term, i.e., for an accuracy of  $\alpha$ , the sample complexity is  $O(1/\alpha^4)$  [6]; Second, the privacy cost is a lower order additive term (for constant  $\varepsilon$  and  $d$ ), i.e., the additional sample complexity due to privacy is  $O_{\delta} \left( \frac{\sqrt{d}}{\alpha^3 \varepsilon} \right)$ .

### 5.2 Global Optimum Convergence

We now turn our focus to the global optimum convergence in the sense of average regret, i.e.,  $J^* - \frac{1}{T} \sum_{t=1}^T \mathbb{E} [J(\theta_t)]$ . Following the non-private work [6], we will also consider two different scenarios and aim to establish the corresponding sample complexities in the private case.



198 In the first scenario, in addition to Assumption 1, we further assume the following two conditions on  
 199 the policy class, both of which are commonly used in the non-private case. The first condition is the  
 200 so-called *Fisher-non-degenerate policy*, formally defined below.

201 **Assumption 2** (Fisher-non-degenerate, adapted from Assumption 2.1 of Ding et al. [29]). For all  
 202  $\theta \in \mathbb{R}^d$ , there exists  $\gamma > 0$  s.t. the Fisher information matrix  $F_\rho(\theta)$  induced by policy  $\pi_\theta$  and initial  
 203 state distribution  $\rho$  satisfies

$$F_\rho(\theta) = \mathbb{E}_{x \sim \rho, y \sim \pi_\theta(\cdot|x)} [\nabla_\theta \log \pi_\theta(y|x) \nabla_\theta \log \pi_\theta(y|x)^\top] \geq \gamma \mathbf{I}_d.$$

204 This assumption is commonly used in the literature on non-private PG methods [6, 29, 5, 30]. As  
 205 shown in Sec B.2 in Ding et al. [29], this assumption is satisfied by the Gaussian policy and even  
 206 certain neural policies.

207 The next condition is the so-called *compatible function approximation*, which is also a common  
 208 assumption in the PG literature to handle function approximation error in the non-tabular case.

209 **Assumption 3** (Compatible, adapted from Assumption 4.6 in Ding et al. [29]). For all  $\theta \in \mathbb{R}^d$ , there  
 210 exists  $\alpha_{\text{bias}} > 0$  such that the *transferred compatible function approximation error* satisfies

$$\mathbb{E}_{x \sim \rho, y \sim \pi_{\theta^*}(\cdot|s)} [(A^{\pi_\theta}(x, y) - u^{*\top} \nabla_\theta \log \pi_\theta(y|x))^2] \leq \alpha_{\text{bias}}, \quad (5)$$

211 where  $\pi_{\theta^*}$  is an optimal policy and  $u^* = F_\rho(\theta)^\dagger \nabla J(\theta)$ .

212 The “compatible” here means that we are approximating the advantage function  $A^{\pi_\theta}(s, a)$  using  
 213 the  $\nabla_\theta \log \pi_\theta(a|s)$  as the feature vector; The “transfer error” here means that we are shifting to  
 214 the expectation over an optimal policy (rather than the current policy). The error  $\alpha_{\text{bias}}$  is zero for a  
 215 softmax tabular policy and small when  $\pi_\theta$  is a rich neural policy. [29–31].

216 With the above two additional assumptions along with the LS assumption in Assumption 1, we have  
 217 the following important result, which implies that the objective  $J(\theta)$  satisfies the so-called *relaxed*  
 218 *weak gradient domination*.

219 **Lemma 1** (Lemma 4.7 in Ding et al. [29]). *If the policy class  $\pi_\theta$  satisfies Assumptions 1, 2 and 3,*  
 220 *then we have*

$$J^* - J(\theta) \leq \frac{G}{\gamma} \|\nabla J(\theta)\| + \sqrt{\alpha_{\text{bias}}}.$$

221 This lemma essentially allows us to easily translate a guarantee in terms of FOSP to a certain global  
 222 optimum convergence. This leads to our next main result with its proof given in Appendix E.2.

223 **Theorem 3.** *Consider the same setting of Theorem 2 and further let Assumptions 2 and 3 hold. Then,*  
 224 *for any  $\alpha > 0$ , DP-PG enjoys the following average regret guarantee*

$$J^* - \frac{1}{T} \sum_{t=1}^T \mathbb{E}[J(\theta_t)] \leq O(\alpha) + O(\sqrt{\alpha_{\text{bias}}}),$$

225 *when the sample size satisfies  $N \geq O_\delta \left( \frac{1}{\alpha^4 \gamma^4} + \frac{\sqrt{d}}{\alpha^3 \gamma^3 \varepsilon} \right)$ .*

226 **Remark 5.** In the above bound, we explicitly include the parameter  $\gamma$  to clearly illustrate its impact.  
 227 The first term  $O\left(\frac{1}{\alpha^4 \gamma^4}\right)$  matches the non-private one in Yuan et al. [6] while the second term is the  
 228 privacy cost. As we can see, for both terms, there exists an additional  $1/\gamma$  factor compared to the  
 229 sample complexity of FOSP. Thus, for very small but still positive  $\gamma$ , our bound could be large.

230 Our second scenario is about the specific policy class of softmax in the tabular setting, which allows  
 231 us to get rid of the parameter  $\gamma$ . Due to space limit, we relegate these results to Appendix B.

## 232 6 Differentially Private NPG and REBEL

233 In this section, we turn to DP-NPG and DP-REBEL, private variants of NPG and RRBEL, and analyze  
 234 their sample complexities. In particular, we will consider a general private regression oracle as the  
 235 `PrivUpdate` in Algorithm 1 and then give concrete examples under different specific regression  
 236 oracles. Given the similarity, we will mainly focus on DP-NPG in the main paper and relegate the  
 237 detailed discussion on DP-REBEL to Appendix D.

## 6.1 A Master Algorithm and Guarantee

Our proposed DP-NPG is Algorithm 1 with its `PrivUpdate` being instantiated in Algorithm 3 below, which relies on a general private regression oracle to return an approximate minimizer of an estimation problem under the square loss. The square loss in (6) is almost the same as before, as in (2), except that we now take the expectation over a general base policy  $\mu$  rather than the specific on-policy  $\pi_{\theta_t}$ . This update is often called approximate NPG in the literature [5]. As will be shown later, the performance of the algorithm will depend on the choice of  $\mu$  in terms of its coverage.

---

### Algorithm 3 `PrivUpdate` Instantiation for DP-NPG

---

- 1: **Input:**  $D_t = \{(x_i, y_i, \hat{A}_t(x_i, y_i))\}_{i=1}^m$ , current policy  $\theta_t$ , base policy  $\mu$ , learning rate  $\eta$ , `PrivLS` oracle
  - 2: **Output:**  $\theta_{t+1}$
  - 3: Call the `PrivLS` oracle on  $D_t := \{(x_i, y_i, \hat{A}_t(x_i, y_i))\}$  to find an approximate minimizer  $w_t$  of
$$\operatorname{argmin}_{w \in \mathcal{W}} F_t(w) := \mathbb{E}_{x \sim \rho, y \sim \mu(\cdot|x)} \left[ \left( A^{\pi_{\theta_t}}(x, y) - w^\top \nabla \log \pi_{\theta_t}(y|x) \right)^2 \right] \quad (6)$$
  - 4: Output policy  $\theta_{t+1} = \theta_t + \eta w_t$
- 

We now aim to establish a generic performance guarantee of DP-NPG. To start with, we assume that the approximate minimizer  $w_t$  returned by `PrivLS` at each iteration satisfies the following guarantee.

**Assumption 4** (Private estimation error). For each  $t \in [T]$ , the `PrivLS` oracle satisfies  $(\varepsilon, \delta)$ -DP while ensuring that with probability at least  $1 - \zeta$ ,

$$\mathbb{E}_{x \sim \rho, y \sim \mu(\cdot|x)} \left[ \left( A^{\pi_{\theta_t}}(x, y) - w_t^\top \nabla \log \pi_{\theta_t}(y|x) \right)^2 \right] \leq \operatorname{err}_t^2(m, \varepsilon, \delta, \zeta),$$

for some error function  $\operatorname{err}_t^2(m, \varepsilon, \delta, \zeta)$  over batch size  $m$ , privacy parameters  $\varepsilon, \delta$ , and probability  $\zeta$ .

In addition, we assume standard regularity assumptions commonly used even in the non-private case.

**Assumption 5** ( $\beta$ -smoothness and boundedness).  $\log \pi_\theta(y|x)$  is a  $\beta$ -smooth function of  $\theta$  for all  $x, y$ , i.e.,

$$\|\nabla_\theta \log \pi_\theta(y|x) - \nabla_{\theta'} \log \pi_{\theta'}(y|x)\|_2 \leq \beta \|\theta - \theta'\|_2.$$

Moreover, there exists a constant  $W > 0$  such that for all  $t \in [T]$ , the weight vectors  $w_t$  generated by the update rule satisfy  $\|w_t\|_2 \leq W$ .

Our main result is given by the following theorem.

**Theorem 4** (Master theorem). *Let Assumptions 4 and 5 hold. Then, DP-NPG satisfies  $(\varepsilon, \delta)$ -DP as in Definition 2. Moreover, if  $\pi_1 := \pi_{\theta_1}$  is a uniform distribution at each state and  $\eta = \sqrt{\frac{2 \log |\mathcal{Y}|}{T \beta W^2}}$ , with probability at least  $1 - \zeta$ , for any comparator policy  $\pi^*$ , we have*

$$J(\pi^*) - \frac{1}{T} \sum_{t=1}^T J(\pi_t) \leq \sqrt{\frac{\beta W^2 \log |\mathcal{Y}|}{2T}} + \frac{\sqrt{C_{\mu \rightarrow \pi^*}}}{T} \sum_{t=1}^T \operatorname{err}_t(m, \varepsilon, \delta, \zeta),$$

where  $C_{\mu \rightarrow \pi^*} := \max_{x, y} \frac{\pi^*(y|x)}{\mu(y|x)}$  and  $\pi_t := \pi_{\theta_t}$ .

We use the most intuitive coverage definition for  $C_{\mu \rightarrow \pi^*}$ , i.e., the density ratio, for illustrating the key idea. One can easily extend it to other types of coverage, e.g., relative condition number for the linear case [5] and transfer coefficient for general function classes [32].

## 6.2 Applications

With the above master theorem in hand, we now only need to determine the estimation error under different types of `PrivLS`. To start with, we consider a general `PrivLS` under general function classes for both reward and policy. Specifically, it runs approximate least squares with the exponential

mechanism [33] for privacy protection, as detailed in Algorithm 4 below. To determine its estimation error, we will first present a new result, which could be of independent interest.

---

**Algorithm 4** PrivLS Instantiation for DP-NPG via Exponential Mechanism

---

- 1: **Input:**  $D_t = \{(x_i, y_i, \hat{A}_t(x_i, y_i))\}_{i=1}^m$ , privacy budget  $\varepsilon$ , current policy  $\theta_t$ , reward range  $R_{\max}$
- 2: **Output:**  $w_t$
- 3: Sample  $w_t \in \mathcal{W}$  with the following distribution:

$$P(w) \propto \exp\left(-\frac{\varepsilon}{8R_{\max}^2} \cdot L(w)\right) \quad \forall w \in \mathcal{W},$$

$$\text{where } L(w) := \sum_{i \in [m]} [w^\top \nabla \log \pi_{\theta_t}(y_i | x_i) - \hat{A}_t(x_i, y_i)]^2$$


---

**Lemma 2** (Private LS with exponential mechanism). *Let  $R > 0$ ,  $\zeta \in (0, 1)$ , we consider a general sequential estimation setting with an instance space  $\mathcal{U}$  and target space  $\mathcal{Z}$ . Let  $\mathcal{H} : \mathcal{U} \rightarrow [-R, R]$  be a class of real-valued functions. Let  $D = \{(u_i, z_i)\}_{i=1}^m$  be a dataset of  $m$  points where  $u_i \sim \rho_i = \rho_i(u_{1:i-1}, z_{1:i-1})$ , and  $z_i = h^*(u_i) + \eta_i$ , where  $\eta_i$  is zero-mean noise and  $h^*$  satisfies approximate realizability, i.e.,*

$$\inf_{h \in \mathcal{H}} \frac{1}{m} \sum_{t=1}^m \mathbb{E}_{u \sim \rho_i} [(h^*(u) - h(u))^2] \leq \alpha_{\text{approx}}. \quad (7)$$

Suppose  $\max_i |z_i| \leq R$  and  $\max_u |h^*(u)| \leq R$ . Then, sampling  $\hat{h}$  via the following distribution from exponential mechanism

$$P(h) \propto \exp\left(-\frac{\varepsilon}{8R^2} \cdot L(h)\right) \quad \forall h \in \mathcal{H},$$

with  $L(h) := \sum_{i \in [m]} [h(u_i) - z_i]^2$ , yields that

$$\sum_{i=1}^m \mathbb{E}_{u \sim \rho_i} [(\hat{h}(u_i) - h^*(u_i))^2] \lesssim R^2 \log(|\mathcal{H}|/\zeta) + R^2 \frac{\log(|\mathcal{H}|/\zeta)}{\varepsilon} + m \cdot \alpha_{\text{approx}}.$$

This lemma can be viewed as the private variant of Lemma 15 in [32]. To leverage this lemma for Algorithm 4, we observe the following mappings for each iteration  $t$ :  $\mathcal{H}$  maps to  $\mathcal{W}$ ,  $u_i = (\pi_{\theta_t}, x_i, y_i)$ ,  $h(u_i) = w^\top \nabla \log \pi_{\theta_t}(y_i | x_i)$ ,  $z_i = \hat{A}_t(x_i, y_i)$  with  $\mathbb{E}[z_i] = A^{\pi_{\theta_t}}(x_i, y_i)$ , which can be rewritten as an unknown function  $w^* = h^*$  over  $(\pi_{\theta_t}, x_i, y_i)$ . Finally, in our case,  $\rho_i$  is non-sequential and fixed during each update, i.e.,  $x_i \sim \rho$ ,  $y_i \sim \mu(\cdot | x_i)$  and  $\pi_{\theta_t}$  is fixed at  $t$ . Thus, the approximation error condition in (7) translates to the following one:

$$\inf_{w \in \mathcal{W}} \mathbb{E}_{x \sim \rho, y \sim \mu(\cdot | x)} [(A^{\pi_{\theta_t}}(x, y) - w^\top \nabla \log \pi_{\theta_t}(y | x))^2] \leq \alpha_{\text{approx}}. \quad (8)$$

Based on these discussions, we have the following guarantee of DP-NPG with Algorithm 4.

**Corollary 1** (General function class). *Consider DP-NPG with PrivLS as in Algorithm 4. Then, DP-NPG satisfies  $(\varepsilon, 0)$ -DP. Suppose for each  $t \in [T]$ , there exists an  $\alpha_{\text{approx}}$  such that (8) holds. Then, under the same assumptions in Theorem 4, we have*

$$J(\pi^*) - \frac{1}{T} \sum_{t=1}^T J(\pi_t) \lesssim \sqrt{\frac{\beta W^2 \log |\mathcal{Y}|}{T}} + \sqrt{C_{\mu \rightarrow \pi^*} \alpha_{\text{approx}}} + \sqrt{C_{\mu \rightarrow \pi^*} \cdot \frac{(1 + 1/\varepsilon) \log(|\mathcal{W}|/\zeta)}{m}}.$$

This implies that, for a given suboptimality gap of  $O(\alpha + \sqrt{C_{\mu \rightarrow \pi^*} \alpha_{\text{approx}}})$ , the sample complexity bound is  $N = T \cdot m = \tilde{O}\left((\frac{1}{\alpha^4} + \frac{1}{\alpha^4 \varepsilon}) \cdot \log |\mathcal{W}| \cdot \beta W^2\right)$ .

**Remark 6.** Several remarks are in order. First, due to the exponential mechanism, we achieve pure DP (i.e.,  $\delta = 0$ ) rather than approximate DP; Second, our results hold for general reward and policy function classes. We state the result for a finite  $\mathcal{W}$  for ease of presentation. It can be easily extended for an infinite class using a standard covering argument. For instance, if  $\mathcal{W} = \mathbb{R}^d$ , then  $\log(|\mathcal{W}|)$  can



be converted to  $\tilde{O}(d)$ . Meanwhile, we remark that in general, Algorithm 4 is not computationally efficient. Thus, the above result is mainly from the statistical perspective. Note that we also explore several efficient oracles for specific scenarios later. Finally, we highlight that the approximation error in (8) is different from the transfer error in (5), which directly takes expectation over the target optimal policy. In contrast, when we use  $\alpha_{\text{approx}}$ , we have to account for the transition from  $\mu$  to  $\pi^*$  explicitly via  $C_{\mu \rightarrow \pi^*}$ . This is the case even in the non-private case (cf. Corollary 21 in [5]).

**Log-linear policy class with realizability.** We now turn to computationally efficient PrivLS oracles by considering a concrete case where the policy is log-linear and reward  $r$  is realizable. More specifically, the policy  $\pi_\theta$  is given by some  $\theta \in \mathbb{R}^d$  and feature vector  $\phi_{x,y} \in \mathbb{R}^d$  with  $\pi_\theta(y | x) = \frac{\exp(\theta^\top \phi_{x,y})}{\sum_{y' \in \mathcal{Y}} \exp(\theta^\top \phi_{x,y'})}$  and  $\|\phi_{x,y}\| \leq B$ . This leads to the fact that  $\nabla_\theta \log \pi_\theta(y|x) = \phi_{x,y} - \mathbb{E}_{y' \sim \pi_\theta(\cdot|x)}[\phi_{x,y'}]$  and smoothness parameter of  $B^2$ . Further, we assume the reward  $r(x, y) = \langle w^*, \phi_{x,y} \rangle$  is a linear function with respect to  $\phi_{x,y}$ , i.e., compatible realizability. In this case, Assumption 4 reduces to estimation error (or in-distribution generalization error) of linear regression:

$$\mathbb{E}_{x \sim \rho, y \sim \mu(\cdot|x)} \left[ (\langle w_t - w^*, \bar{\phi}_{x,y}^t \rangle)^2 \right] \leq \text{err}_t^2(m, \varepsilon, \delta, \zeta), \quad (9)$$

where  $\bar{\phi}_{x,y}^t := \phi_{x,y} - \mathbb{E}_{y' \sim \pi_{\theta_t}(\cdot|x)}[\phi_{x,y'}]$ , which depends on the current policy.

The above particular form allows us to leverage recent advances in private linear regression, both in the low-dimension and high-dimension cases, respectively.

**Corollary 2 (Log-linear policy in low-dimension).** *Consider DP-NPG with the above log-linear class (with smoothness parameter  $\beta = B^2$ ). Suppose PrivLS is instantiated with the ISSP algorithm in [34]. Then, by [34, Theorem 5], we have that  $\text{err}_t(m, \varepsilon, \delta, \zeta) \leq \alpha$ , when  $m \geq \tilde{O}\left(\frac{d}{\alpha^2} + \frac{d\sqrt{\log(1/\delta)}}{\alpha\varepsilon} + \frac{d(\log(1/\delta))^2}{\varepsilon^2}\right)$ . Thus, by Theorem 4, for a suboptimality gap of  $O(\alpha)$ , the sample complexity bound is  $N = T \cdot m = \tilde{O}_\delta\left(\left(\frac{d}{\alpha^4} + \frac{d}{\alpha^3\varepsilon} + \frac{d}{\alpha^2\varepsilon^2}\right) \cdot B^2 W^2\right)$ .*

**Corollary 3 (Log-linear policy in high-dimension).** *Consider DP-NPG with the above log-linear class (with smoothness parameter  $\beta = B^2$ ). Suppose PrivLS is instantiated with Algorithm 5 in [35]. Then, by [35, Theorem 6.2], we have that  $\text{err}_t(m, \varepsilon, \delta, \zeta) \leq \alpha$  when  $m \geq \tilde{O}\left(\frac{\log(1/\zeta)}{\alpha^4} + \frac{\sqrt{\log(1/\zeta)\log(1/\delta)}}{\alpha^3\varepsilon}\right)$ . Thus, by Theorem 4, for a suboptimality gap of  $O(\alpha)$ , the sample complexity bound is  $N = T \cdot m = \tilde{O}_\delta\left(\left(\frac{1}{\alpha^6} + \frac{1}{\alpha^5\varepsilon}\right) \cdot B^2 W^2\right)$ .*

One key subtlety behind these two corollaries is that  $W$  can be large and depend on  $d$ . This is due to the fact that the update  $w_t$  in both PrivLS oracles is privatized by a Gaussian noise in the last step. Thus, by standard concentration of a Gaussian vector,  $W$  can be on the order of  $\sqrt{d}$ . This subtlety is somewhat unique due to the interplay between PrivLS oracle and “regret-lemma” type analysis in Theorem 4. In practice, one can properly truncate  $w_t$ , which preserves privacy. In theory, we conjecture that one may use a different technique (e.g., based on the three-point lemma in [36]) to avoid the requirement of bounded  $w_t$ , which is left to be an exciting future work.

**Connection to private stochastic optimization.** In the context of the above discussion and corollaries, one in-between solution is to aim for suffering dimension dependence only in the private term. This leads us to consider private SGD over a bounded domain, since the estimation error in (9) is equivalent to excess population risk under realizability. Thus, one can leverage existing results on private stochastic optimization to bound  $\text{err}_t(m, \varepsilon, \delta, \zeta)$ , which does not have dimension dependence in the non-private term, but at a cost of a slower rate  $O(1/\sqrt{m})$  vs.  $O(1/m)$ . See Appendix C.

## 7 Conclusion

We initiate a systematic theoretical investigation into the sample complexity of differentially private PO, leveraging a unified meta-algorithmic framework and reductions to private regression problems. We establish the first set of sample complexity results for several widely used PO algorithms under differential privacy constraints, including DP-PG, DP-NPG and DP-REBEL. Our analysis not only quantifies the privacy cost in PO but also uncovers subtle and important interplays between privacy mechanisms and algorithmic structures in PO. These insights offer practical guidance for designing privacy-preserving PO methods. We hope our work will open new avenues for future research in both the theoretical understanding and empirical development of private policy optimization.

## References

- [1] Ronald J Williams. Simple statistical gradient-following algorithms for connectionist reinforcement learning. *Machine learning*, 8:229–256, 1992.
- [2] Richard S Sutton, David McAllester, Satinder Singh, and Yishay Mansour. Policy gradient methods for reinforcement learning with function approximation. *Advances in neural information processing systems*, 12, 1999.
- [3] John Schulman, Filip Wolski, Prafulla Dhariwal, Alec Radford, and Oleg Klimov. Proximal policy optimization algorithms. *arXiv preprint arXiv:1707.06347*, 2017.
- [4] Zhihong Shao, Peiyi Wang, Qihao Zhu, Runxin Xu, Junxiao Song, Xiao Bi, Haowei Zhang, Mingchuan Zhang, YK Li, Y Wu, et al. Deepseekmath: Pushing the limits of mathematical reasoning in open language models. *arXiv preprint arXiv:2402.03300*, 2024.
- [5] Alekh Agarwal, Sham M Kakade, Jason D Lee, and Gaurav Mahajan. On the theory of policy gradient methods: Optimality, approximation, and distribution shift. *Journal of Machine Learning Research*, 22(98):1–76, 2021.
- [6] Rui Yuan, Robert M Gower, and Alessandro Lazaric. A general sample complexity analysis of vanilla policy gradient. In *International Conference on Artificial Intelligence and Statistics*, pages 3332–3380. PMLR, 2022.
- [7] Lior Shani, Yonathan Efroni, and Shie Mannor. Adaptive trust region policy optimization: Global convergence and faster rates for regularized mdps. In *Proceedings of the AAAI Conference on Artificial Intelligence*, volume 34, pages 5668–5675, 2020.
- [8] Boyi Liu, Qi Cai, Zhuoran Yang, and Zhaoran Wang. Neural trust region/proximal policy optimization attains globally optimal policy. *Advances in neural information processing systems*, 32, 2019.
- [9] Cynthia Dwork, Frank McSherry, Kobbi Nissim, and Adam Smith. Calibrating noise to sensitivity in private data analysis. In *Theory of Cryptography: Third Theory of Cryptography Conference, TCC 2006, New York, NY, USA, March 4-7, 2006. Proceedings 3*, pages 265–284. Springer, 2006.
- [10] Sham M Kakade. A natural policy gradient. *Advances in neural information processing systems*, 14, 2001.
- [11] Zhaolin Gao, Jonathan D. Chang, Wenhao Zhan, Owen Oertell, Gokul Swamy, Kianté Brantley, Thorsten Joachims, J. Andrew Bagnell, Jason D. Lee, and Wen Sun. Rebel: Reinforcement learning via regressing relative rewards, 2024. URL <https://arxiv.org/abs/2404.16767>.
- [12] Alexandre Rio, Merwan Barlier, and Igor Colin. Differentially private policy gradient. *arXiv preprint arXiv:2501.19080*, 2025.
- [13] Sayak Ray Chowdhury and Xingyu Zhou. Differentially private regret minimization in episodic markov decision processes. In *Proceedings of the AAAI Conference on Artificial Intelligence*, volume 36, pages 6375–6383, 2022.
- [14] Xingyu Zhou. Differentially private reinforcement learning with linear function approximation. *Proceedings of the ACM on Measurement and Analysis of Computing Systems*, 6(1):1–27, 2022.
- [15] Borja Balle, Maziar Gomrokchi, and Doina Precup. Differentially private policy evaluation. In *International Conference on Machine Learning*, pages 2130–2138. PMLR, 2016.
- [16] Fan Wu, Huseyin A Inan, Arturs Backurs, Varun Chandrasekaran, Janardhan Kulkarni, and Robert Sim. Privately aligning language models with reinforcement learning. *arXiv preprint arXiv:2310.16960*, 2023.
- [17] Zhaolin Gao, Wenhao Zhan, Jonathan D Chang, Gokul Swamy, Kianté Brantley, Jason D Lee, and Wen Sun. Regressing the relative future: Efficient policy optimization for multi-turn rlhf. *arXiv preprint arXiv:2410.04612*, 2024.

- [18] Tongxin Zhou, Yingfei Wang, Lu Yan, and Yong Tan. Spoiled for choice? personalized recommendation for healthcare decisions: A multiarmed bandit approach. *Information Systems Research*, 34(4):1493–1512, 2023.
- [19] Long Ouyang, Jeffrey Wu, Xu Jiang, Diogo Almeida, Carroll Wainwright, Pamela Mishkin, Chong Zhang, Sandhini Agarwal, Katarina Slama, Alex Ray, et al. Training language models to follow instructions with human feedback. *Advances in neural information processing systems*, 35:27730–27744, 2022.
- [20] Rafael Rafailov, Archit Sharma, Eric Mitchell, Christopher D Manning, Stefano Ermon, and Chelsea Finn. Direct preference optimization: Your language model is secretly a reward model. *Advances in Neural Information Processing Systems*, 36:53728–53741, 2023.
- [21] Kamalika Chaudhuri, Claire Monteleoni, and Anand D Sarwate. Differentially private empirical risk minimization. *Journal of Machine Learning Research*, 12(3), 2011.
- [22] Raef Bassily, Adam Smith, and Abhradeep Thakurta. Private empirical risk minimization: Efficient algorithms and tight error bounds. In *2014 IEEE 55th annual symposium on foundations of computer science*, pages 464–473. IEEE, 2014.
- [23] Raef Bassily, Vitaly Feldman, Kunal Talwar, and Abhradeep Guha Thakurta. Private stochastic convex optimization with optimal rates. *Advances in neural information processing systems*, 32, 2019.
- [24] Giuseppe Vietri, Borja Balle, Akshay Krishnamurthy, and Steven Wu. Private reinforcement learning with pac and regret guarantees. In *International Conference on Machine Learning*, pages 9754–9764. PMLR, 2020.
- [25] J Hsu, Z Huang, A Roth, T Roughgarden, and ZS Wu. Private matchings and allocations. *SIAM Journal on Computing*, 45:1953–1984, 2016.
- [26] Roshan Shariff and Or Sheffet. Differentially private contextual linear bandits. *Advances in Neural Information Processing Systems*, 31, 2018.
- [27] Dan Qiao and Yu-Xiang Wang. Near-optimal differentially private reinforcement learning. In *International Conference on Artificial Intelligence and Statistics*, pages 9914–9940. PMLR, 2023.
- [28] Cynthia Dwork, Aaron Roth, et al. The algorithmic foundations of differential privacy. *Foundations and Trends® in Theoretical Computer Science*, 9(3–4):211–407, 2014.
- [29] Yuhao Ding, Junzi Zhang, and Javad Lavaei. On the global optimum convergence of momentum-based policy gradient. In Gustau Camps-Valls, Francisco J. R. Ruiz, and Isabel Valera, editors, *Proceedings of The 25th International Conference on Artificial Intelligence and Statistics*, volume 151 of *Proceedings of Machine Learning Research*, pages 1910–1934. PMLR, 28–30 Mar 2022.
- [30] Yanli Liu, Kaiqing Zhang, Tamer Başar, and Wotao Yin. An improved analysis of (variance-reduced) policy gradient and natural policy gradient methods, 2022. URL <https://arxiv.org/abs/2211.07937>.
- [31] Lingxiao Wang, Qi Cai, Zhuoran Yang, and Zhaoran Wang. Neural policy gradient methods: Global optimality and rates of convergence, 2019. URL <https://arxiv.org/abs/1909.01150>.
- [32] Yuda Song, Yifei Zhou, Ayush Sekhari, J Andrew Bagnell, Akshay Krishnamurthy, and Wen Sun. Hybrid rl: Using both offline and online data can make rl efficient. *arXiv preprint arXiv:2210.06718*, 2022.
- [33] Frank McSherry and Kunal Talwar. Mechanism design via differential privacy. In *48th Annual IEEE Symposium on Foundations of Computer Science (FOCS’07)*, pages 94–103. IEEE, 2007.
- [34] Gavin Brown, Jonathan Hayase, Samuel Hopkins, Weihao Kong, Xiyang Liu, Sewoong Oh, Juan C Perdomo, and Adam Smith. Insufficient statistics perturbation: Stable estimators for private least squares. *arXiv preprint arXiv:2404.15409*, 2024.

- [35] Fan Chen, Jiachun Li, Alexander Rakhlin, and David Simchi-Levi. Near-optimal private learning in linear contextual bandits, 2025. URL <https://arxiv.org/abs/2502.13115>.
- [36] Rui Yuan, Simon S Du, Robert M Gower, Alessandro Lazaric, and Lin Xiao. Linear convergence of natural policy gradient methods with log-linear policies. *arXiv preprint arXiv:2210.01400*, 2022.
- [37] Matteo Papini, Damiano Binaghi, Giuseppe Canonaco, Matteo Pirota, and Marcello Restelli. Stochastic variance-reduced policy gradient. In *International conference on machine learning*, pages 4026–4035. PMLR, 2018.
- [38] John Schulman, Sergey Levine, Pieter Abbeel, Michael Jordan, and Philipp Moritz. Trust region policy optimization. In *International conference on machine learning*, pages 1889–1897. PMLR, 2015.
- [39] Jalaj Bhandari and Daniel Russo. Global optimality guarantees for policy gradient methods. *Operations Research*, 72(5):1906–1927, 2024.
- [40] Boyi Liu, Qi Cai, Zhuoran Yang, and Zhaoran Wang. Neural proximal/trust region policy optimization attains globally optimal policy (2019). *arXiv preprint arXiv:1906.10306*, 1906.
- [41] Yanli Liu, Kaiqing Zhang, Tamer Basar, and Wotao Yin. An improved analysis of (variance-reduced) policy gradient and natural policy gradient methods. *Advances in Neural Information Processing Systems*, 33:7624–7636, 2020.
- [42] Lior Shani, Yonathan Efroni, Aviv Rosenberg, and Shie Mannor. Optimistic policy optimization with bandit feedback. In *International Conference on Machine Learning*, pages 8604–8613. PMLR, 2020.
- [43] Qi Cai, Zhuoran Yang, Chi Jin, and Zhaoran Wang. Provably efficient exploration in policy optimization. In *International Conference on Machine Learning*, pages 1283–1294. PMLR, 2020.
- [44] Alekh Agarwal, Mikael Henaff, Sham Kakade, and Wen Sun. Pc-pg: Policy cover directed exploration for provable policy gradient learning. *Advances in neural information processing systems*, 33:13399–13412, 2020.
- [45] Andrea Zanette, Ching-An Cheng, and Alekh Agarwal. Cautiously optimistic policy optimization and exploration with linear function approximation. In *Conference on Learning Theory*, pages 4473–4525. PMLR, 2021.
- [46] Qinghua Liu, Gellért Weisz, András György, Chi Jin, and Csaba Szepesvári. Optimistic natural policy gradient: a simple efficient policy optimization framework for online rl. *Advances in Neural Information Processing Systems*, 36:3560–3577, 2023.
- [47] Nikita Mishra and Abhradeep Thakurta. (nearly) optimal differentially private stochastic multi-arm bandits. In *Proceedings of the Thirty-First Conference on Uncertainty in Artificial Intelligence*, pages 592–601, 2015.
- [48] Touqir Sajed and Or Sheffet. An optimal private stochastic-mab algorithm based on optimal private stopping rule. In *International Conference on Machine Learning*, pages 5579–5588. PMLR, 2019.
- [49] Sayak Ray Chowdhury and Xingyu Zhou. Distributed differential privacy in multi-armed bandits. *arXiv preprint arXiv:2206.05772*, 2022.
- [50] Jiahao He, Jiheng Zhang, and Rachel Q Zhang. A reduction from linear contextual bandits lower bounds to estimations lower bounds. In *International Conference on Machine Learning*, pages 8660–8677. PMLR, 2022.
- [51] Sayak Ray Chowdhury and Xingyu Zhou. Shuffle private linear contextual bandits. *arXiv preprint arXiv:2202.05567*, 2022.
- [52] Xingyu Zhou and Sayak Ray Chowdhury. On differentially private federated linear contextual bandits. *arXiv preprint arXiv:2302.13945*, 2023.

- [53] Paul Luyo, Evrard Garcelon, Alessandro Lazaric, and Matteo Pirodda. Differentially private exploration in reinforcement learning with linear representation. *arXiv preprint arXiv:2112.01585*, 2021.
- [54] Vitaly Feldman, Tomer Koren, and Kunal Talwar. Private stochastic convex optimization: optimal rates in linear time. In *Proceedings of the 52nd Annual ACM SIGACT Symposium on Theory of Computing*, pages 439–449, 2020.
- [55] Hilal Asi, Vitaly Feldman, Tomer Koren, and Kunal Talwar. Private stochastic convex optimization: Optimal rates in  $\ell_1$  geometry. In *International Conference on Machine Learning*, pages 393–403. PMLR, 2021.
- [56] Raef Bassily, Cristóbal Guzmán, and Anupama Nandi. Non-euclidean differentially private stochastic convex optimization. In *Conference on Learning Theory*, pages 474–499. PMLR, 2021.
- [57] Janardhan Kulkarni, Yin Tat Lee, and Daogao Liu. Private non-smooth empirical risk minimization and stochastic convex optimization in subquadratic steps. *arXiv preprint arXiv:2103.15352*, 2021.
- [58] Andrew Lowy and Meisam Razaviyayn. Private federated learning without a trusted server: Optimal algorithms for convex losses. In *The Eleventh International Conference on Learning Representations*, 2023.
- [59] Changyu Gao, Andrew Lowy, Xingyu Zhou, and Stephen J Wright. Private heterogeneous federated learning without a trusted server revisited: Error-optimal and communication-efficient algorithms for convex losses. *arXiv preprint arXiv:2407.09690*, 2024.
- [60] Di Wang, Changyou Chen, and Jinhui Xu. Differentially private empirical risk minimization with non-convex loss functions. In *International Conference on Machine Learning*, pages 6526–6535. PMLR, 2019.
- [61] Yingxue Zhou, Xiangyi Chen, Mingyi Hong, Zhiwei Steven Wu, and Arindam Banerjee. Private stochastic non-convex optimization: Adaptive algorithms and tighter generalization bounds. *arXiv preprint arXiv:2006.13501*, 2020.
- [62] Raman Arora, Raef Bassily, Tomás González, Cristóbal A Guzmán, Michael Menart, and Enayat Ullah. Faster rates of convergence to stationary points in differentially private optimization. In *International Conference on Machine Learning*, pages 1060–1092. PMLR, 2023.
- [63] Daogao Liu, Arun Ganesh, Sewoong Oh, and Abhradeep Guha Thakurta. Private (stochastic) non-convex optimization revisited: Second-order stationary points and excess risks. *Advances in Neural Information Processing Systems*, 36:65618–65641, 2023.
- [64] Daogao Liu and Kunal Talwar. Adaptive batch size for privately finding second-order stationary points. *arXiv preprint arXiv:2410.07502*, 2024.
- [65] Yu-Xiang Wang. Revisiting differentially private linear regression: optimal and adaptive prediction & estimation in unbounded domain. *arXiv preprint arXiv:1803.02596*, 2018.
- [66] Or Sheffet. Old techniques in differentially private linear regression. In *Algorithmic Learning Theory*, pages 789–827. PMLR, 2019.
- [67] T Tony Cai, Yichen Wang, and Linjun Zhang. The cost of privacy: Optimal rates of convergence for parameter estimation with differential privacy. *The Annals of Statistics*, 49(5):2825–2850, 2021.
- [68] Gavin Brown, Krishnamurthy Dvijotham, Georgina Evans, Daogao Liu, Adam Smith, and Abhradeep Thakurta. Private gradient descent for linear regression: Tighter error bounds and instance-specific uncertainty estimation. *arXiv preprint arXiv:2402.13531*, 2024.
- [69] Prateek Varshney, Abhradeep Thakurta, and Prateek Jain. (nearly) optimal private linear regression for sub-gaussian data via adaptive clipping. In *Conference on Learning Theory*, pages 1126–1166. PMLR, 2022.

- 533 [70] Xiyang Liu, Prateek Jain, Weihao Kong, Sewoong Oh, and Arun Suggala. Label robust and  
 534 differentially private linear regression: Computational and statistical efficiency. *Advances in*  
 535 *Neural Information Processing Systems*, 36:23019–23033, 2023.
- 536 [71] Prashanti Anderson, Ainesh Bakshi, Mahbod Majid, and Stefan Tiegel. Sample-optimal private  
 537 regression in polynomial time. *arXiv preprint arXiv:2503.24321*, 2025.
- 538 [72] Dylan J Foster, Sham M Kakade, Jian Qian, and Alexander Rakhlin. The statistical complexity  
 539 of interactive decision making. *arXiv preprint arXiv:2112.13487*, 2021.

## 540 **NeurIPS Paper Checklist**

### 541 **1. Claims**

542 Question: Do the main claims made in the abstract and introduction accurately reflect the  
 543 paper’s contributions and scope?

544 Answer: [\[Yes\]](#)

545 Justification: : In the abstract and introduction, we clearly state the main contributions of  
 546 our work. We present a meta algorithm for Private PO and give out three private algorithm:  
 547 DP-PG, DP-NPG, DP-REBEL and analyze their sample complexity.

548 Guidelines:

- 549 • The answer NA means that the abstract and introduction do not include the claims  
 550 made in the paper.
- 551 • The abstract and/or introduction should clearly state the claims made, including the  
 552 contributions made in the paper and important assumptions and limitations. A No or  
 553 NA answer to this question will not be perceived well by the reviewers.
- 554 • The claims made should match theoretical and experimental results, and reflect how  
 555 much the results can be expected to generalize to other settings.
- 556 • It is fine to include aspirational goals as motivation as long as it is clear that these goals  
 557 are not attained by the paper.

### 558 **2. Limitations**

559 Question: Does the paper discuss the limitations of the work performed by the authors?

560 Answer: [\[Yes\]](#)

561 Justification: The limitations of this work can be found in appendix.

562 Guidelines:

- 563 • The answer NA means that the paper has no limitation while the answer No means that  
 564 the paper has limitations, but those are not discussed in the paper.
- 565 • The authors are encouraged to create a separate "Limitations" section in their paper.
- 566 • The paper should point out any strong assumptions and how robust the results are to  
 567 violations of these assumptions (e.g., independence assumptions, noiseless settings,  
 568 model well-specification, asymptotic approximations only holding locally). The authors  
 569 should reflect on how these assumptions might be violated in practice and what the  
 570 implications would be.
- 571 • The authors should reflect on the scope of the claims made, e.g., if the approach was  
 572 only tested on a few datasets or with a few runs. In general, empirical results often  
 573 depend on implicit assumptions, which should be articulated.
- 574 • The authors should reflect on the factors that influence the performance of the approach.  
 575 For example, a facial recognition algorithm may perform poorly when image resolution  
 576 is low or images are taken in low lighting. Or a speech-to-text system might not be  
 577 used reliably to provide closed captions for online lectures because it fails to handle  
 578 technical jargon.
- 579 • The authors should discuss the computational efficiency of the proposed algorithms  
 580 and how they scale with dataset size.
- 581 • If applicable, the authors should discuss possible limitations of their approach to  
 582 address problems of privacy and fairness.



- While the authors might fear that complete honesty about limitations might be used by reviewers as grounds for rejection, a worse outcome might be that reviewers discover limitations that aren't acknowledged in the paper. The authors should use their best judgment and recognize that individual actions in favor of transparency play an important role in developing norms that preserve the integrity of the community. Reviewers will be specifically instructed to not penalize honesty concerning limitations.

### 3. Theory assumptions and proofs

Question: For each theoretical result, does the paper provide the full set of assumptions and a complete (and correct) proof?

Answer: [Yes]

Justification: In this paper, all theoretical results are accompanied by a full set of assumptions and complete proofs. These are clearly stated and numbered within the main text and are cross-referenced appropriately. Detailed proofs for major theorems are provided in the Appendix.

Guidelines:

- The answer NA means that the paper does not include theoretical results.
- All the theorems, formulas, and proofs in the paper should be numbered and cross-referenced.
- All assumptions should be clearly stated or referenced in the statement of any theorems.
- The proofs can either appear in the main paper or the supplemental material, but if they appear in the supplemental material, the authors are encouraged to provide a short proof sketch to provide intuition.
- Inversely, any informal proof provided in the core of the paper should be complemented by formal proofs provided in appendix or supplemental material.
- Theorems and Lemmas that the proof relies upon should be properly referenced.

### 4. Experimental result reproducibility

Question: Does the paper fully disclose all the information needed to reproduce the main experimental results of the paper to the extent that it affects the main claims and/or conclusions of the paper (regardless of whether the code and data are provided or not)?

Answer: [NA]

Justification: The nature of this paper is purely theoretical research, and its conclusions are derived through mathematical deduction and logical argumentation; therefore, it does not involve experimental validation.

Guidelines:

- The answer NA means that the paper does not include experiments.
- If the paper includes experiments, a No answer to this question will not be perceived well by the reviewers: Making the paper reproducible is important, regardless of whether the code and data are provided or not.
- If the contribution is a dataset and/or model, the authors should describe the steps taken to make their results reproducible or verifiable.
- Depending on the contribution, reproducibility can be accomplished in various ways. For example, if the contribution is a novel architecture, describing the architecture fully might suffice, or if the contribution is a specific model and empirical evaluation, it may be necessary to either make it possible for others to replicate the model with the same dataset, or provide access to the model. In general, releasing code and data is often one good way to accomplish this, but reproducibility can also be provided via detailed instructions for how to replicate the results, access to a hosted model (e.g., in the case of a large language model), releasing of a model checkpoint, or other means that are appropriate to the research performed.
- While NeurIPS does not require releasing code, the conference does require all submissions to provide some reasonable avenue for reproducibility, which may depend on the nature of the contribution. For example
  - (a) If the contribution is primarily a new algorithm, the paper should make it clear how to reproduce that algorithm.

- (b) If the contribution is primarily a new model architecture, the paper should describe the architecture clearly and fully.
- (c) If the contribution is a new model (e.g., a large language model), then there should either be a way to access this model for reproducing the results or a way to reproduce the model (e.g., with an open-source dataset or instructions for how to construct the dataset).
- (d) We recognize that reproducibility may be tricky in some cases, in which case authors are welcome to describe the particular way they provide for reproducibility. In the case of closed-source models, it may be that access to the model is limited in some way (e.g., to registered users), but it should be possible for other researchers to have some path to reproducing or verifying the results.

## 5. Open access to data and code

Question: Does the paper provide open access to the data and code, with sufficient instructions to faithfully reproduce the main experimental results, as described in supplemental material?

Answer: [NA]

Justification: Our conclusions are derived through mathematical deduction and logical argumentation, so it does not include experiments requiring code.

Guidelines:

- The answer NA means that paper does not include experiments requiring code.
- Please see the NeurIPS code and data submission guidelines (<https://nips.cc/public/guides/CodeSubmissionPolicy>) for more details.
- While we encourage the release of code and data, we understand that this might not be possible, so “No” is an acceptable answer. Papers cannot be rejected simply for not including code, unless this is central to the contribution (e.g., for a new open-source benchmark).
- The instructions should contain the exact command and environment needed to run to reproduce the results. See the NeurIPS code and data submission guidelines (<https://nips.cc/public/guides/CodeSubmissionPolicy>) for more details.
- The authors should provide instructions on data access and preparation, including how to access the raw data, preprocessed data, intermediate data, and generated data, etc.
- The authors should provide scripts to reproduce all experimental results for the new proposed method and baselines. If only a subset of experiments are reproducible, they should state which ones are omitted from the script and why.
- At submission time, to preserve anonymity, the authors should release anonymized versions (if applicable).
- Providing as much information as possible in supplemental material (appended to the paper) is recommended, but including URLs to data and code is permitted.

## 6. Experimental setting/details

Question: Does the paper specify all the training and test details (e.g., data splits, hyperparameters, how they were chosen, type of optimizer, etc.) necessary to understand the results?

Answer: [NA]

Justification: This paper does not include experiments.

Guidelines:

- The answer NA means that the paper does not include experiments.
- The experimental setting should be presented in the core of the paper to a level of detail that is necessary to appreciate the results and make sense of them.
- The full details can be provided either with the code, in appendix, or as supplemental material.

## 7. Experiment statistical significance

Question: Does the paper report error bars suitably and correctly defined or other appropriate information about the statistical significance of the experiments?

Answer: [NA]

Justification: This paper does not include experiments.

Guidelines:

- The answer NA means that the paper does not include experiments.
- The authors should answer "Yes" if the results are accompanied by error bars, confidence intervals, or statistical significance tests, at least for the experiments that support the main claims of the paper.
- The factors of variability that the error bars are capturing should be clearly stated (for example, train/test split, initialization, random drawing of some parameter, or overall run with given experimental conditions).
- The method for calculating the error bars should be explained (closed form formula, call to a library function, bootstrap, etc.)
- The assumptions made should be given (e.g., Normally distributed errors).
- It should be clear whether the error bar is the standard deviation or the standard error of the mean.
- It is OK to report 1-sigma error bars, but one should state it. The authors should preferably report a 2-sigma error bar than state that they have a 96% CI, if the hypothesis of Normality of errors is not verified.
- For asymmetric distributions, the authors should be careful not to show in tables or figures symmetric error bars that would yield results that are out of range (e.g. negative error rates).
- If error bars are reported in tables or plots, The authors should explain in the text how they were calculated and reference the corresponding figures or tables in the text.

## 8. Experiments compute resources

Question: For each experiment, does the paper provide sufficient information on the computer resources (type of compute workers, memory, time of execution) needed to reproduce the experiments?

Answer: [NA]

Justification: This paper does not include experiments.

Guidelines:

- The answer NA means that the paper does not include experiments.
- The paper should indicate the type of compute workers CPU or GPU, internal cluster, or cloud provider, including relevant memory and storage.
- The paper should provide the amount of compute required for each of the individual experimental runs as well as estimate the total compute.
- The paper should disclose whether the full research project required more compute than the experiments reported in the paper (e.g., preliminary or failed experiments that didn't make it into the paper).

## 9. Code of ethics

Question: Does the research conducted in the paper conform, in every respect, with the NeurIPS Code of Ethics <https://neurips.cc/public/EthicsGuidelines?>

Answer: [Yes]

Justification: Our research adheres to all guidelines outlined in the NeurIPS Code of Ethics.

Guidelines:

- The answer NA means that the authors have not reviewed the NeurIPS Code of Ethics.
- If the authors answer No, they should explain the special circumstances that require a deviation from the Code of Ethics.
- The authors should make sure to preserve anonymity (e.g., if there is a special consideration due to laws or regulations in their jurisdiction).

## 10. Broader impacts

Question: Does the paper discuss both potential positive societal impacts and negative societal impacts of the work performed?

Answer: [NA]

Justification: There is no societal impact of the work performed.

Guidelines:

- The answer NA means that there is no societal impact of the work performed.
- If the authors answer NA or No, they should explain why their work has no societal impact or why the paper does not address societal impact.
- Examples of negative societal impacts include potential malicious or unintended uses (e.g., disinformation, generating fake profiles, surveillance), fairness considerations (e.g., deployment of technologies that could make decisions that unfairly impact specific groups), privacy considerations, and security considerations.
- The conference expects that many papers will be foundational research and not tied to particular applications, let alone deployments. However, if there is a direct path to any negative applications, the authors should point it out. For example, it is legitimate to point out that an improvement in the quality of generative models could be used to generate deepfakes for disinformation. On the other hand, it is not needed to point out that a generic algorithm for optimizing neural networks could enable people to train models that generate Deepfakes faster.
- The authors should consider possible harms that could arise when the technology is being used as intended and functioning correctly, harms that could arise when the technology is being used as intended but gives incorrect results, and harms following from (intentional or unintentional) misuse of the technology.
- If there are negative societal impacts, the authors could also discuss possible mitigation strategies (e.g., gated release of models, providing defenses in addition to attacks, mechanisms for monitoring misuse, mechanisms to monitor how a system learns from feedback over time, improving the efficiency and accessibility of ML).

## 11. Safeguards

Question: Does the paper describe safeguards that have been put in place for responsible release of data or models that have a high risk for misuse (e.g., pretrained language models, image generators, or scraped datasets)?

Answer: [NA]

Justification: This paper poses no such risks.

Guidelines:

- The answer NA means that the paper poses no such risks.
- Released models that have a high risk for misuse or dual-use should be released with necessary safeguards to allow for controlled use of the model, for example by requiring that users adhere to usage guidelines or restrictions to access the model or implementing safety filters.
- Datasets that have been scraped from the Internet could pose safety risks. The authors should describe how they avoided releasing unsafe images.
- We recognize that providing effective safeguards is challenging, and many papers do not require this, but we encourage authors to take this into account and make a best faith effort.

## 12. Licenses for existing assets

Question: Are the creators or original owners of assets (e.g., code, data, models), used in the paper, properly credited and are the license and terms of use explicitly mentioned and properly respected?

Answer: [NA]

Justification: This paper does not use existing assets.

Guidelines:

- The answer NA means that the paper does not use existing assets.

- The authors should cite the original paper that produced the code package or dataset.
- The authors should state which version of the asset is used and, if possible, include a URL.
- The name of the license (e.g., CC-BY 4.0) should be included for each asset.
- For scraped data from a particular source (e.g., website), the copyright and terms of service of that source should be provided.
- If assets are released, the license, copyright information, and terms of use in the package should be provided. For popular datasets, [paperswithcode.com/datasets](https://paperswithcode.com/datasets) has curated licenses for some datasets. Their licensing guide can help determine the license of a dataset.
- For existing datasets that are re-packaged, both the original license and the license of the derived asset (if it has changed) should be provided.
- If this information is not available online, the authors are encouraged to reach out to the asset's creators.

### 13. New assets

Question: Are new assets introduced in the paper well documented and is the documentation provided alongside the assets?

Answer: [NA]

Justification: This paper does not release new assets.

Guidelines:

- The answer NA means that the paper does not release new assets.
- Researchers should communicate the details of the dataset/code/model as part of their submissions via structured templates. This includes details about training, license, limitations, etc.
- The paper should discuss whether and how consent was obtained from people whose asset is used.
- At submission time, remember to anonymize your assets (if applicable). You can either create an anonymized URL or include an anonymized zip file.

### 14. Crowdsourcing and research with human subjects

Question: For crowdsourcing experiments and research with human subjects, does the paper include the full text of instructions given to participants and screenshots, if applicable, as well as details about compensation (if any)?

Answer: [NA]

Justification: This research does not involve any form of crowdsourcing or studies with human subjects.

Guidelines:

- The answer NA means that the paper does not involve crowdsourcing nor research with human subjects.
- Including this information in the supplemental material is fine, but if the main contribution of the paper involves human subjects, then as much detail as possible should be included in the main paper.
- According to the NeurIPS Code of Ethics, workers involved in data collection, curation, or other labor should be paid at least the minimum wage in the country of the data collector.

### 15. Institutional review board (IRB) approvals or equivalent for research with human subjects

Question: Does the paper describe potential risks incurred by study participants, whether such risks were disclosed to the subjects, and whether Institutional Review Board (IRB) approvals (or an equivalent approval/review based on the requirements of your country or institution) were obtained?

Answer: [NA]

843 Justification: The study does not include human subjects, and therefore IRB approval is not  
844 required.

845 Guidelines:

- 846 • The answer NA means that the paper does not involve crowdsourcing nor research with  
847 human subjects.
- 848 • Depending on the country in which research is conducted, IRB approval (or equivalent)  
849 may be required for any human subjects research. If you obtained IRB approval, you  
850 should clearly state this in the paper.
- 851 • We recognize that the procedures for this may vary significantly between institutions  
852 and locations, and we expect authors to adhere to the NeurIPS Code of Ethics and the  
853 guidelines for their institution.
- 854 • For initial submissions, do not include any information that would break anonymity (if  
855 applicable), such as the institution conducting the review.

## 856 16. Declaration of LLM usage

857 Question: Does the paper describe the usage of LLMs if it is an important, original, or  
858 non-standard component of the core methods in this research? Note that if the LLM is used  
859 only for writing, editing, or formatting purposes and does not impact the core methodology,  
860 scientific rigorousness, or originality of the research, declaration is not required.

861 Answer: [NA]

862 Justification: This research does not use large language models as an important component  
863 of the core methodology, it is used only for editing.

864 Guidelines:

- 865 • The answer NA means that the core method development in this research does not  
866 involve LLMs as any important, original, or non-standard components.
- 867 • Please refer to our LLM policy (<https://neurips.cc/Conferences/2025/LLM>)  
868 for what should or should not be described.



|     |                                                          |           |
|-----|----------------------------------------------------------|-----------|
| 869 | <b>Contents of Appendix</b>                              |           |
| 870 | <b>A Additional Related Work</b>                         | <b>21</b> |
| 871 | <b>B Tabular Softmax with Log-barrier Regularization</b> | <b>22</b> |
| 872 | <b>C Connection to Private Stochastic Optimization</b>   | <b>23</b> |
| 873 | <b>D Differentially Private REBEL</b>                    | <b>23</b> |
| 874 | <b>E Proof of Chapter 5</b>                              | <b>24</b> |
| 875 | E.1 Proof of Theorem 2 . . . . .                         | 24        |
| 876 | E.2 Proof of Theorem 3 . . . . .                         | 27        |
| 877 | E.3 Proof of Theorem 5 . . . . .                         | 27        |
| 878 | E.3.1 FOSP of softmax policy . . . . .                   | 28        |
| 879 | E.3.2 Global optimum convergence . . . . .               | 30        |
| 880 | <b>F Proof of Chapter 6</b>                              | <b>32</b> |
| 881 | F.1 Proof of Theorem 4 . . . . .                         | 32        |
| 882 | F.2 Proof of Lemma 2 . . . . .                           | 33        |
| 883 | <b>G Proof of Appendix D</b>                             | <b>34</b> |
| 884 | G.1 Proof of Theorem 6 . . . . .                         | 35        |
| 885 | <b>H Limitations</b>                                     | <b>36</b> |
| 886 | <b>A Additional Related Work</b>                         |           |

887 **Policy optimization.** The theoretical study of policy optimization can be roughly divided into two  
888 lines of work. The first line often assumes a certain reachability (coverage) condition and takes a  
889 perspective from optimization. Under this assumption, various types of policy gradient methods have  
890 been investigated, including REINFORCE [1], variance-reduction variants [37], and preconditioned  
891 variants such as NPG [10], TRPO [38], and PPO [3]. The performance metrics are often convergence  
892 rate or sample complexity, see some typical results in [5, 39, 6, 40, 41]. The second line of work  
893 focuses on the exploration setting, i.e., without the coverage condition. To this end, the algorithm  
894 design is often based on optimism, e.g., an optimistic version of NPG or PPO via bonus terms or  
895 global optimism. Several recent papers have made progress in this direction for tabular RL [42],  
896 linear mixture MDP [43], linear MDP and more [44–46]. Our paper can be viewed as the first work  
897 that aims to privatize the first line of work above.

898 **Differentially private RL and bandits.** Recently, a line of work studies RL (bandits) under the  
899 constraint of differential privacy, e.g., multi-armed bandits (MABs) [47–49], contextual bandits [26,  
900 35, 50–52], and RL [24, 13, 27, 14, 53]. To the best of our knowledge, only [13] and [14] studied  
901 private RL under policy optimization. They consider the exploration setting and characterize the cost  
902 of privacy in regret bounds by privatizing optimistic versions of PPO (NPG) under tabular or linear  
903 function approximations, respectively. In contrast, we take the optimization perspective (with the  
904 coverage condition) and study private PO for general reward/policy function approximations.

905 **Differentially private stochastic optimization.** Extensive research has been done around private  
906 stochastic convex and non-convex optimization. In particular, for the problem of differentially private  
907 stochastic convex optimization (DP-SCO), [23] gave the first optimal algorithm in terms of excess

population loss, and [54] developed the first linear-time efficient and optimal algorithm. There are also many follow-up papers under various settings, e.g., [55–59]. Moving to the non-convex case, the performance metrics include first-order or second-order population stationary points (e.g., [60–64]) as well as excess population loss (e.g., [63]). As already mentioned, these results in private stochastic optimization can be useful to us since the estimation error in our master theorem is equivalent to excess population loss/risk under square loss and realizability, see Appendix C for more details.

**Differentially private linear regression.** For the specific problem of private linear regression (which is a special case of DP-SCO), one can possibly achieve better results by leveraging its structure. We can roughly group the research efforts<sup>1</sup> in this area based on the conditions on the boundedness of the feature vector (and the true parameter). Assuming boundedness, state-of-the-art results are established in [65, 66]. On the other hand, without boundedness but under a general sub-Gaussian data, ISSP in [34] is the first efficient and nearly-optimal algorithm, which does not require an identity covariance matrix compared with [67, 68] and does not depend on the condition number of the covariance matrix compared with [69, 70]. Moving from approximate DP to pure DP, the very recent work [71] gives the first polynomial-time and sample-optimal private regression algorithm. As mentioned before, these results on private linear regression are useful to us since, under log-linear policy parameterization, our estimation error reduces to the estimation error in linear regression.

## B Tabular Softmax with Log-barrier Regularization

In this section, we move to the second scenario for our DP-PG of global convergence where we consider the tabular case with the classic softmax policy:

**Definition 3** (Tabular softmax policy). Consider a finite state space  $\mathcal{X}$  and action space  $\mathcal{Y}$ . For any state-action pair  $(x, y) \in \mathcal{X} \times \mathcal{Y}$ , the softmax policy is given by

$$\pi_\theta(y|x) = \frac{\exp(\theta_{x,y})}{\sum_{y' \in \mathcal{Y}} \exp(\theta_{x,y'})},$$

where  $\theta \in \mathbb{R}^{|\mathcal{X}||\mathcal{Y}|}$ .

One key motivation here is to leverage the tabular structure and the specific property of softmax policy to establish a sample complexity of global optimum convergence that is independent of the parameter  $\gamma$ . To this end, as in the non-private case [5, 6], we will consider a regularized problem, whose FOSP turns out to be an approximate global optimal solution of the unregularized (original) objective, for proper choice of regularization. In particular, we consider the following log-barrier regularization objective:

$$\begin{aligned} J_\lambda(\theta) &:= J(\theta) - \lambda \mathbb{E}_{x \sim \text{Unif}_\mathcal{X}} [\text{KL}(\text{Unif}_\mathcal{Y}, \pi_\theta(\cdot|x))] \\ &= J(\theta) + \frac{\lambda}{|\mathcal{Y}||\mathcal{X}|} \sum_{x,y} \log \pi_\theta(y|x) + \lambda \log |\mathcal{Y}|, \end{aligned} \quad (10)$$

where the KL divergence is  $\text{KL}(p, q) = \mathbb{E}_{x \sim p} \left[ \log \frac{p(x)}{q(x)} \right]$ ,  $\text{Unif}_\mathcal{X}$  denotes the uniform distribution over a set  $\mathcal{X}$  and  $\lambda > 0$  is the regularization constant.

We will run our DP-PG over this regularized objective by using the sample-based gradient estimator at each step with proper choices of batch size and learning rate. Then, we have the following main result regarding the global optimum convergence in terms of the unregularized  $J(\theta)$ . The proof is given in Appendix E.3.

**Theorem 5.** Consider Algorithm 2 applied to  $J_\lambda(\theta)$ . For any  $m > 0$ , setting  $\sigma^2 = \frac{16 \ln(1.25/\delta) \cdot R_{\max}^2 G^2}{m^2 \varepsilon^2}$  ensures  $(\varepsilon, \delta)$ -DP as in Definition 2. Further, there exist proper choices of parameters for  $m$  and  $\eta$ , such that the following holds

$$J^* - \frac{1}{T} \sum_{t=1}^T \mathbb{E} [J(\theta_t)] \leq O(\alpha),$$

when the sample size satisfies  $N \geq O\left(\frac{1}{\alpha^6} + \frac{\sqrt{d}}{\alpha^{9/2}\varepsilon}\right)$ .

<sup>1</sup>As before, this is not a complete list of all the works in this area.

947 *Remark 7.* The first term in the sample complexity bound matches the non-private one in Yuan et al.  
 948 [6], while the second term is the lower-order privacy cost (for constant  $\varepsilon$  and  $d$ ). We note that while  
 949 the dependence on  $\alpha$  is worse than the previous one, there is no dependence on  $\gamma$  in the bound, which  
 950 could offer benefits when  $\gamma$  is quite small.

## 951 C Connection to Private Stochastic Optimization

952 In this section, we first aim to bound the estimation error in (9) by leveraging the existing result in  
 953 private SCO. In particular, we aim to apply Theorem 3.2 in [23] for a Lipschitz and smooth loss  
 954 function. The first step is to realize that under realizability, the LHS in (9) is equal to the excess  
 955 population loss for a square loss, which is both Lipschitz (with parameter of order  $O(B^2W)$  under  
 956 our boundedness assumption for both feature and parameter space) and smooth (with parameter  
 957 of  $O(B^2)$ ). Hence, by [23, Theorem 3.2], we can obtain that  $\text{err}_t(m, \varepsilon, \delta, \zeta) \leq \alpha$  when  $m \geq$   
 958  $\tilde{O}\left(\frac{1}{\alpha^4} + \frac{\sqrt{d \log(1/\delta)}}{\alpha^2 \varepsilon}\right) \cdot O(\text{Poly}(B, W))$ . Thus, by Theorem 4, for a suboptimality gap of  $O(\alpha)$ ,  
 959 the sample complexity bound is  $N = T \cdot m = \tilde{O}_\delta\left(\left(\frac{1}{\alpha^6} + \frac{\sqrt{d}}{\alpha^4 \varepsilon}\right) \cdot \text{Poly}(B, W)\right)$ . Recall that due  
 960 to projection in the mini-batch SGD in [23], one can ensure that  $\|w_t\| \leq W$  for some  $W$  that is  
 961 independent of  $d$ . Thus, the non-private term does not depend on  $d$ . We mention in passing that one  
 962 can also potentially directly bound the error in Assumption 4 by leveraging the excess population  
 963 loss for non-convex loss functions.

## 964 D Differentially Private REBEL

965 In this section, we will consider DP-REBEL which includes a general private regression oracle as the  
 966 `PrivUpdate` in Algorithm 1 and then similar to our previous DP-NPG, we will give some concrete  
 967 applications under different specific regression oracles.

968 Our proposed DP-REBEL is Algorithm 1 with its `PrivUpdate` being instantiated in Algorithm 5,  
 969 which also relies on a general private least-square regression oracle to return an approximate minimizer  
 970 of an estimation problem under the square loss. The square loss in (11) is the same as before in (3).

---

### Algorithm 5 `PrivUpdate` Instantiation for DP-REBEL

---

- 1: **Input:**  $D_t = \{(x_i, y_i, \hat{A}_t(x_i, y_i))\}_{i=1}^m$ , current policy  $\theta_t$ , base policy  $\mu$ , learning rate  $\eta$ , `PrivLS` oracle
- 2: **Output:**  $\theta_{t+1}$
- 3: Call the `PrivLS` oracle on  $D_t := \{(x_i, y_i, \hat{A}_t(x_i, y_i))\}$  to find an approximate minimizer  $w_t$  of

$$\arg\min_{\theta \in \Theta} F_t(\theta) = E \left[ \frac{1}{\eta} \left( \ln \frac{\pi_{\theta}(y|x)}{\pi_{\theta_t}(y|x)} - \ln \frac{\pi_{\theta}(y'|x)}{\pi_{\theta_t}(y'|x)} \right) - (r(x, y) - r(x, y')) \right]^2, \quad (11)$$

- where expectation is over  $x \sim \rho, y \sim \mu(\cdot|x), y' \sim \pi_{\theta_t}(\cdot|x)$ .
- 4: Output policy  $\theta_{t+1} = \theta_t + \eta w_t$
- 

971 We now turn to establish a generic performance guarantee of DP-REBEL. Similar to DP-NPG, we  
 972 assume that the approximate minimizer  $w_t$  returned by `PrivLS` at each iteration satisfies the following  
 973 guarantee.

974 **Assumption 6** (Private estimation error). For each  $t \in [T]$ , the `PrivLS` oracle satisfies  $(\varepsilon, \delta)$ -  
 975 differential privacy and ensures that with probability at least  $1 - \zeta$ ,

$$\mathbb{E} \left[ \frac{1}{\eta} \left( \ln \frac{\pi_{\theta_{t+1}}(y|x)}{\pi_{\theta_t}(y|x)} - \ln \frac{\pi_{\theta_{t+1}}(y'|x)}{\pi_{\theta_t}(y'|x)} \right) - (r(x, y) - r(x, y')) \right]^2 \leq \text{err}_t^2(m, \varepsilon, \delta, \zeta),$$

976 for some statistical error function  $\text{err}_t^2(m, \varepsilon, \delta, \zeta)$  depending on batch size  $m$ , privacy parameters  
 977  $(\varepsilon, \delta)$ , and probability  $\zeta$ , also, expectation here is over  $x \sim \rho, y \sim \mu(\cdot|x), y' \sim \pi_{\theta_t}(\cdot|x)$ .

978 *Remark 8.* This assumption parallels Assumption 4 in DP-NPG and ensures that our private oracle  
 979 accurately estimates the relative reward differences while preserving our DP in PO as Definition 2.

980 Our main result is given by the following theorem.

981 **Theorem 6.** *Under Assumption 6, according to Lemma 11 and Lemma 12, we have with probability*  
 982 *at least  $1 - \zeta$ , for any comparator policy  $\pi^*$  such that:*

$$J(\pi^*) - \frac{1}{T} \sum_{t=1}^T J(\pi_t) \leq 2A \sqrt{\frac{\ln |\mathcal{Y}|}{T}} + \frac{\sqrt{10C_{\mu \rightarrow \pi^*}}}{T} \sum_{t=1}^T \text{err}_t(m, \varepsilon, \delta, \zeta).$$

983 *Remark 9.* If we simply set the base policy  $\mu = \pi_{\theta_t}$ , which make this assumption simpler,  
 984 then we can have a tighter bound, it is easy to show that the bound will turns to  $2A \sqrt{\frac{\ln |\mathcal{Y}|}{T}} +$   
 985  $\frac{\sqrt{2C_{\mu \rightarrow \pi^*}}}{T} \sum_{t=1}^T \text{err}_t(m, \varepsilon, \delta, \zeta)$ .

986 The application here is totally same as the DP-NPG, thus we can directly use our previous Corol-  
 987 lary 1, Corollary 2 and Corollary 3 which derive the almost same bound of sample complex-  
 988 ity. For Private LS with exponential mechanism, consider DP-REBEL with PrivLS as in Algo-  
 989 rithm 4, for a given suboptimality gap of  $O(\alpha + \sqrt{C_{\mu \rightarrow \pi^*} \alpha_{\text{approx}}})$ , the sample complexity bound is  
 990  $N = T \cdot m = \tilde{O}((\frac{1}{\alpha^4} + \frac{1}{\alpha^4 \varepsilon}) \cdot \log |\mathcal{W}| \cdot A^2)$ . For log-linear policy class with realizability, assume  
 991 that  $\text{err}_t(m, \varepsilon, \delta, \zeta) \leq \alpha$ , therefore, for log-liner-policy in low-dimension and high-dimension, we  
 992 have  $m \geq \tilde{O}\left(\frac{d}{\alpha^2} + \frac{d\sqrt{\log(1/\delta)}}{\alpha \varepsilon} + \frac{d(\log(1/\delta))^2}{\varepsilon^2}\right)$ , and  $m \geq \tilde{O}\left(\frac{\log(1/\zeta)}{\alpha^4} + \frac{\sqrt{\log(1/\zeta) \log(1/\delta)}}{\alpha^3 \varepsilon}\right)$ , re-  
 993 spectively. Thus, we can derive such sample complexity:  $N = T \cdot m = \tilde{O}_\delta((\frac{d}{\alpha^4} + \frac{d}{\alpha^3 \varepsilon} + \frac{d}{\alpha^2 \varepsilon^2}) \cdot A^2)$   
 994 for log-liner-policy in low-dimension and  $N = T \cdot m = \tilde{O}_\delta((\frac{1}{\alpha^6} + \frac{1}{\alpha^5 \varepsilon}) \cdot A^2)$  for high-dimension.

## 995 E Proof of Chapter 5

### 996 E.1 Proof of Theorem 2

997 **Lemma 3 (ABC).** *There exists constants  $A, B, C \geq 0$  such that the policy gradient estimator*  
 998 *satisfies:*

$$\mathbb{E} \left[ \left\| \tilde{\nabla}_m J(\theta) \right\|^2 \right] \leq 2A(J^* - J(\theta)) + B \|\nabla J(\theta)\|^2 + C, \quad (12)$$

999 where  $\nabla J(\theta) = \mathbb{E}_{x \sim \rho, y \sim \pi_\theta(\cdot|s)} [A^{\pi_\theta}(x, y) \nabla_\theta \log \pi_\theta(y|x)]$ , and  $A = 0, B = 1 - 1/m, C =$   
 1000  $\frac{4R_{\max}^2 G^2}{m} + d\sigma^2$ .

1001 *Proof.* For notation simplicity, we let  $g_\theta(\tau_i) := A^{\pi_\theta}(x_i, y_i) \nabla_\theta \log \pi_\theta(y_i|x_i)$ . Thus, we have  
 1002  $\tilde{\nabla}_m J(\theta) = \frac{1}{m} \sum_i g_\theta(\tau_i) + Z$ . Notice that  $\mathbb{E}[g_\theta(\tau_i)] = \mathbb{E}[\tilde{\nabla}_m J(\theta)] = \nabla J(\theta)$ , cause  $Z$  is the  
 1003 gaussian bias, which expectation is 0.

1004 Now, we have

$$\begin{aligned}
\mathbb{E} \left[ \left\| \tilde{\nabla}_m J(\theta) \right\|^2 \right] &= \mathbb{E} \left[ \left\| \frac{1}{m} \sum_i g_\theta(\tau_i) + Z \right\|^2 \right] \\
&= \mathbb{E} \left[ \left\| \frac{1}{m} \sum_i g_\theta(\tau_i) \right\|^2 \right] + \mathbb{E} [\|Z\|^2] + 2 \cdot \mathbb{E} \left[ \left\langle \frac{1}{m} \sum_i g_\theta(\tau_i), Z \right\rangle \right] \\
&= \mathbb{E} \left[ \left\| \frac{1}{m} \sum_i g_\theta(\tau_i) \right\|^2 \right] + d\sigma^2 + 0 \\
&= \mathbb{E} \left[ \left\| \frac{1}{m} \sum_i g_\theta(\tau_i) - \nabla J(\theta) + \nabla J(\theta) \right\|^2 \right] + d\sigma^2 \\
&= \|\nabla J(\theta)\|^2 + \mathbb{E} \left[ \left\| \frac{1}{m} \sum_i g_\theta(\tau_i) - \nabla J(\theta) \right\|^2 \right] + d\sigma^2 \\
&= \|\nabla J(\theta)\|^2 + \frac{1}{m^2} \sum_i \mathbb{E} [\|g_\theta(\tau_i) - \nabla J(\theta)\|^2] + d\sigma^2 \\
&= \|\nabla J(\theta)\|^2 + \frac{1}{m} \cdot \mathbb{E} [\|g_\theta(\tau_1)\|^2 - \|\nabla J(\theta)\|^2] + d\sigma^2.
\end{aligned}$$

1005 To proceed, we need to establish an upper bound on  $\mathbb{E} [\|g_\theta(\tau_1)\|^2]$ . In particular, we have

$$\begin{aligned}
\mathbb{E} [\|g_\theta(\tau_1)\|^2] &= \mathbb{E} [ |A^{\pi_\theta}(x_1, y_1)|^2 \|\nabla_\theta \log \pi_\theta(y_1 | x_1)\|^2 ] \\
&\leq 4R_{\max}^2 G^2,
\end{aligned}$$

1006 which follows from LS assumption in Assumption 1.

1007 Hence, we conclude that:

$$\mathbb{E} \left[ \left\| \tilde{\nabla}_m J(\theta) \right\|^2 \right] \leq \left( 1 - \frac{1}{m} \right) \|\nabla J(\theta)\|^2 + \frac{4R_{\max}^2 G^2}{m} + d\sigma^2.$$

1008 i.e., ABC condition in (12) is satisfied with  $A = 0, B = 1 - 1/m, C = \frac{4R_{\max}^2 G^2}{m} + d\sigma^2$  □

1009 **Lemma 4** (Smoothness under LS). *Under LS assumption in Assumption 1,  $J(\cdot)$  is  $L$ -smooth, namely*  
1010  $\|\nabla^2 J(\theta)\| \leq L$  for all  $\theta$ , with

$$L = 2R_{\max}(G^2 + F).$$

1011 *Proof.* For smoothness, it suffices to bound the operator norm of Hessian, i.e.,  $\|\nabla^2 J(\theta)\|$ .

1012 By definition, we have

$$\begin{aligned}
\nabla^2 J(\theta) &= \nabla_\theta \mathbb{E}_{x \sim \rho, y \sim \pi_\theta(\cdot|x)} [A^{\pi_\theta}(x, y) \nabla_\theta \log \pi_\theta(y|x)] \\
&\stackrel{(a)}{=} \nabla_\theta \int p_\theta(x, y) (A^{\pi_\theta}(x, y) \nabla_\theta \log \pi_\theta(y|x)) d(x, y) \\
&\stackrel{(b)}{=} \int \nabla_\theta p_\theta(x, y) (A^{\pi_\theta}(x, y) \nabla_\theta \log \pi_\theta(y|x))^\top d(x, y) + \int p_\theta(x, y) (A^{\pi_\theta}(x, y) \nabla_\theta^2 \log \pi_\theta(y|x)) d(x, y) \\
&= \mathbb{E}_{x, y \sim p_\theta} [A^{\pi_\theta}(x, y) \nabla_\theta \log \pi_\theta(y|x) \log \pi_\theta(y|x)^\top] + \mathbb{E}_{x, y \sim p_\theta} [A^{\pi_\theta}(x, y) \nabla_\theta^2 \log \pi_\theta(y|x)]
\end{aligned}$$

1013 where in (a), we let  $p_\theta(x, y) := \rho(x)\pi_\theta(y|x)$ , and (b) holds by chain rules.

1014 Thus, we have

$$\|\nabla_{\theta}^2 J(\theta)\| \leq \underbrace{\mathbb{E}_{x,y} [ |A^{\pi_{\theta}}(x,y)| \|\nabla_{\theta} \log \pi_{\theta}(y|x)\|^2 ]}_{\mathcal{T}_1} + \underbrace{\mathbb{E}_{x,y} [ |A^{\pi_{\theta}}(x,y)| \|\nabla_{\theta}^2 \log \pi_{\theta}(y|x)\| ]}_{\mathcal{T}_2}.$$

1015 For  $\mathcal{T}_1$  and  $\mathcal{T}_2$ , by Assumption 1, we have

$$\mathcal{T}_1 \leq 2R_{\max} G^2, \quad \mathcal{T}_2 \leq 2R_{\max} F,$$

1016 which hence completes the proof.  $\square$

1017 **Lemma 5** (Adapted from Theorem 3.4 in Yuan et al. [6]). *Suppose that  $J$  is smoothness and*  
 1018 *satisfy ABC assumption in Lemma 3. Consider the iterates  $\theta_t$  of the PG method with step size*  
 1019  *$\eta_t = \eta \in (0, \frac{2}{LB})$ , let  $\delta_1 = J^* - J(\theta_1)$ . In particular, if  $A = 0$ , we have:*

$$E \left[ \|\nabla J(\theta_U)\|^2 \right] \leq \frac{2\delta_1}{\eta T(2 - LB\eta)} + \frac{LC\eta}{2 - LB\eta}. \quad (13)$$

1020 where  $\theta_U$  is uniformly sampled from  $\{\theta_1, \dots, \theta_T\}$

1021 *Proof of Theorem 2.* Followed by Lemma 5, when  $\eta < \frac{1}{LB}$ , we can simplify the equation into this:

$$E \left[ \|\nabla J(\theta_U)\|^2 \right] \leq \frac{2\delta_1}{\eta T} + LC\eta, \quad (14)$$

1022 where  $B = 1 - 1/m$ ,  $\delta_1 = J^* - J(\theta_1)$ ,  $L = 2R_{\max}(G^2 + F)$ ,  $C = \frac{4R_{\max}^2 G^2}{m} + d\sigma^2$ ,  $G$  and  $F$  are  
 1023 constants.

1024 From Theorem 1, to make sure our algorithm satisfy the  $(\varepsilon, \delta)$ -DP as in Definition 2, we set

$$1025 \sigma^2 = \frac{16 \ln(1.25/\delta) \cdot R_{\max}^2 G^2}{m^2 \varepsilon^2}.$$

1026 Based on Lemma 5 and Equation (14), choose  $\eta = \min\{\frac{1}{LB}, \frac{\sqrt{2\delta_1}}{\sqrt{TL}C}\}$ , we have:

$$\begin{aligned} \mathbb{E} \left[ \|\nabla J(\theta_U)\|^2 \right] &\leq \frac{2\delta_1 LB}{T} + \frac{2\sqrt{2\delta_1} LC}{\sqrt{T}} \\ &= O \left( \frac{1}{T} + \frac{\sqrt{C}}{\sqrt{T}} \right) \\ &= O \left( \frac{m}{N} + \frac{1}{\sqrt{N}} + \frac{\sigma\sqrt{md}}{\sqrt{N}} \right) \\ &= O \left( \frac{m}{N} + \frac{1}{\sqrt{N}} + \frac{\sqrt{d}}{\varepsilon\sqrt{Nm}} \right). \end{aligned}$$

1027 To proceed, we need to determine the value of  $m$ .

1028 In order to balance the terms in the convergence bound  $O \left( \frac{m}{N} + \frac{1}{\sqrt{N}} + \frac{\sqrt{d}}{\varepsilon\sqrt{Nm}} \right)$ , we set  $\frac{m}{N} = \frac{\sqrt{d}}{\varepsilon\sqrt{Nm}}$ .

1029 Thus, we have:

$$m = \left( \frac{\sqrt{d}}{\varepsilon} \right)^{2/3} N^{1/3} = (1/\varepsilon)^{2/3} (Nd)^{1/3}.$$

1030 Substituting back, the convergence bound simplifies to:

$$O \left( \frac{1}{\sqrt{N}} + \left( \frac{\sqrt{d}}{N\varepsilon} \right)^{2/3} \right).$$

1031  $\square$



## 1032 E.2 Proof of Theorem 3

1033 *Proof.* We know that:

$$E \left[ \|\nabla J(\theta_U)\|^2 \right] = \frac{1}{T} \sum_{t=1}^T \mathbb{E} \left[ \|\nabla J(\theta_t)\|^2 \right]. \quad (15)$$

1034 Besides, followed by Lemma 1, we obtain that:

$$(J^* - J(\theta))^2 \leq \left( \frac{G}{\gamma} \|\nabla J(\theta)\| + \sqrt{\alpha_{bias}} \right)^2 \leq 2 \frac{G^2}{\gamma^2} \|\nabla J(\theta)\|^2 + 2\alpha_{bias},$$

1035 which holds by  $(p+q)^2 \leq 2p^2 + 2q^2$ .

1036 Taking expectation over both sides condition on  $\theta_t$ , yields that

$$\begin{aligned} \frac{1}{T} \sum_{t=1}^T E[(J^* - J(\theta))^2] &\leq 2 \frac{G^2}{\gamma^2} \frac{1}{T} \sum_{t=1}^T \mathbb{E}[\|\nabla J(\theta_t)\|^2] + 2\alpha_{bias} \\ &\stackrel{(15)}{=} 2 \frac{G^2}{\gamma^2} E[\|\nabla J(\theta_U)\|^2] + 2\alpha_{bias} \\ &\stackrel{(a)}{=} O \left( \frac{1}{\gamma^2} \left( \frac{1}{\sqrt{N}} + \left( \frac{\sqrt{d}}{N\varepsilon} \right)^{2/3} \right) \right) + O(\alpha_{bias}), \end{aligned}$$

1037 where (a) holds by Theorem 2.

1038 By applying Jensen inequality twice, we have:

$$\frac{1}{T} \sum_{t=1}^T E[(J^* - J(\theta))^2] \geq E \left[ \left( J^* - \frac{1}{T} \sum_{t=1}^T J(\theta_t) \right)^2 \right] \geq \left( J^* - \frac{1}{T} \sum_{t=1}^T E[J(\theta_t)] \right)^2.$$

1039 So we can derive that:

$$\left( J^* - \frac{1}{T} \sum_{t=1}^T E[J(\theta_t)] \right)^2 \leq O \left( \frac{1}{\gamma^2} \left( \frac{1}{\sqrt{N}} + \left( \frac{\sqrt{d}}{N\varepsilon} \right)^{2/3} \right) \right) + O(\alpha_{bias}).$$

1040 In that case, we finally get the result:

$$J^* - \frac{1}{T} \sum_{t=1}^T \mathbb{E}[J(\theta_t)] = O \left( \frac{1}{\gamma} \left( N^{-1/4} + \left( \frac{\sqrt{d}}{N\varepsilon} \right)^{1/3} \right) \right) + O(\sqrt{\alpha_{bias}}).$$

1041 Suppose  $J^* - \frac{1}{T} \sum_{t=1}^T \mathbb{E}[J(\theta_t)] \leq O(\alpha) + O(\sqrt{\alpha_{bias}})$ , we have:

$$N \geq O \left( \frac{1}{\alpha^4 \gamma^4} + \frac{\sqrt{d}}{\alpha^3 \gamma^3 \varepsilon} \right).$$

1042 □

## 1043 E.3 Proof of Theorem 5

1044 Based on softmax settings in Definition 3, by simple calculus, we have

$$\begin{aligned} \frac{\partial \log \pi_\theta(y|x)}{\partial \theta_x} &= \mathbf{1}_y - \pi_x(\theta), \\ \frac{\partial^2 \log \pi_\theta(y|x)}{\partial \theta_x^2} &= -\mathbf{H}(\pi_x(\theta)), \end{aligned} \quad (16)$$

1045 where  $\mathbf{1}_y \in \mathbb{R}^{|\mathcal{Y}|}$  is a vector with all zero entries except being 1 for the entry corresponding to action  
 1046  $y$ , and  $\mathbf{H}(\pi_x(\theta)) = \text{Diag}(\pi_x(\theta)) - \pi_x(\theta)\pi_x(\theta)^\top$ .  
 1047 In particular, for softmax, we can determine the  $G$  and  $F$  in Assumption 1:

$$\begin{aligned}\|\nabla_\theta \log \pi_\theta(y \mid x)\| &\leq G := \sqrt{1 - \frac{1}{|\mathcal{Y}|}} \\ \|\nabla_\theta^2 \log \pi_\theta(y \mid x)\| &\leq F := 1.\end{aligned}$$

### 1048 E.3.1 FOSP of softmax policy

1049 **Lemma 6.** *The regularized gradient estimator  $\tilde{\nabla}_m J_\lambda(\theta)$  satisfies ABC assumption in Lemma 3 with*  
 1050 *parameters:*

$$\begin{aligned}A &= 0, \quad B = 1 - \frac{1}{m} \\ C &= \frac{2}{m} \left(1 - \frac{1}{|\mathcal{Y}|}\right) \left(4R_{\max}^2 + \frac{\lambda^2}{|\mathcal{X}|}\right) + d\sigma^2,\end{aligned}$$

1051 Specifically, we have the variance bound:  $\mathbb{E} \left[ \left\| \tilde{\nabla}_m J_\lambda(\theta) \right\|^2 \right] \leq \left(1 - \frac{1}{m}\right) \|\nabla J_\lambda(\theta)\|^2 + d\sigma^2 +$   
 1052  $\frac{2}{m} \left(1 - \frac{1}{|\mathcal{Y}|}\right) \left(4R_{\max}^2 + \frac{\lambda^2}{|\mathcal{X}|}\right).$

1053 *Proof.* Similar to Appendix E.1, here we let  $g_\theta(\tau)$  be a stochastic gradient estimator of one single  
 1054 sampled trajectory  $\tau$ . Thus we have:  $\tilde{\nabla}_m J(\theta) = \frac{1}{m} \sum_i g_\theta(\tau_i) + Z$ .  
 1055 From equation (10) we have the following gradient estimator

$$\tilde{\nabla}_m J_\lambda(\theta) = \tilde{\nabla}_m J(\theta) + \frac{\lambda}{|\mathcal{Y}||\mathcal{X}|} \sum_{x,y} \nabla_\theta \log \pi_{x,y}(\theta).$$

1056 For a state  $x \in \mathcal{X}$ , we have

$$\begin{aligned}\frac{\lambda}{|\mathcal{Y}||\mathcal{X}|} \sum_{y \in \mathcal{Y}} \frac{\partial \log \pi_{x,y}(\theta)}{\partial \theta_x} &\stackrel{(16)}{=} \frac{\lambda}{|\mathcal{Y}||\mathcal{X}|} \sum_{y \in \mathcal{Y}} (\mathbf{1}_y - \pi_x(\theta)) \\ &= \frac{\lambda \mathbf{1}_{|\mathcal{Y}|}}{|\mathcal{Y}||\mathcal{X}|} - \frac{\lambda}{|\mathcal{X}|} \pi_x(\theta) \\ &= \frac{\lambda}{|\mathcal{X}|} \left( \frac{\mathbf{1}_{|\mathcal{Y}|}}{|\mathcal{Y}|} - \pi_x(\theta) \right),\end{aligned}$$

1057 where  $\mathbf{1}_{|\mathcal{Y}|} \in \mathbb{R}^{|\mathcal{Y}|}$  is a vector of all ones.

1058 Thus we have

$$\tilde{\nabla}_m J_\lambda(\theta) = \tilde{\nabla}_m J(\theta) + \frac{\lambda}{|\mathcal{X}|} \left( \frac{\mathbf{1}}{|\mathcal{Y}|} - [\pi_x(\theta)]_{x \in \mathcal{X}} \right), \quad (17)$$

1059 where  $\mathbf{1} \in \mathbb{R}^{|\mathcal{X}||\mathcal{Y}|}$  and  $[\pi_x(\theta)]_{x \in \mathcal{X}} = [\pi_{x_1}(\theta); \dots; \pi_{x_{|\mathcal{X}|}}(\theta)] \in \mathbb{R}^{|\mathcal{X}||\mathcal{Y}|}$  is the stacking of the vectors  
 1060  $\pi_x(\theta)$ .

1061 Next, taking expectation on the trajectories, we have

$$\begin{aligned}
\mathbb{E} \left[ \left\| \tilde{\nabla}_m J_\lambda(\theta) \right\|^2 \right] &\stackrel{(17)}{=} \mathbb{E} \left[ \left\| \tilde{\nabla}_m J(\theta) + \frac{\lambda}{|\mathcal{X}|} \left( \frac{\mathbf{1}}{|\mathcal{Y}|} - [\pi_x(\theta)]_{x \in \mathcal{X}} \right) \right\|^2 \right] \\
&= \mathbb{E} \left[ \left\| \nabla J(\theta) + \frac{\lambda}{|\mathcal{X}|} \left( \frac{\mathbf{1}}{|\mathcal{Y}|} - [\pi_x(\theta)]_{x \in \mathcal{X}} \right) + \tilde{\nabla}_m J(\theta) - \nabla J(\theta) \right\|^2 \right] \\
&\stackrel{(a)}{=} \|\nabla J_\lambda(\theta)\|^2 + \mathbb{E} \left[ \left\| \tilde{\nabla}_m J(\theta) - \nabla J(\theta) \right\|^2 \right] \\
&\stackrel{(b)}{=} \|\nabla J_\lambda(\theta)\|^2 + \mathbb{E} \left[ \left\| \hat{\nabla}_m J(\theta) + \mathbf{Z} - \nabla J(\theta) \right\|^2 \right] \\
&= \|\nabla J_\lambda(\theta)\|^2 + \frac{\mathbb{E} [\|g_\theta(\tau_1) - \nabla J(\theta)\|^2]}{m} + d\sigma^2 \\
&= \|\nabla J_\lambda(\theta)\|^2 + d\sigma^2 \\
&\quad + \frac{\mathbb{E} \left[ \left\| g_\theta(\tau_1) + \frac{\lambda}{|\mathcal{X}|} \left( \frac{\mathbf{1}}{|\mathcal{Y}|} - [\pi_x(\theta)]_{x \in \mathcal{X}} \right) - \nabla J(\theta) - \frac{\lambda}{|\mathcal{X}|} \left( \frac{\mathbf{1}}{|\mathcal{Y}|} - [\pi_x(\theta)]_{x \in \mathcal{X}} \right) \right\|^2 \right]}{m} \\
&\stackrel{(c)}{=} \left( 1 - \frac{1}{m} \right) \|\nabla J_\lambda(\theta)\|^2 + \frac{\mathbb{E} \left[ \left\| g_\theta(\tau_1) + \frac{\lambda}{|\mathcal{X}|} \left( \frac{\mathbf{1}}{|\mathcal{Y}|} - [\pi_x(\theta)]_{x \in \mathcal{X}} \right) \right\|^2 \right]}{m} + d\sigma^2 \\
&\stackrel{(d)}{\leq} \left( 1 - \frac{1}{m} \right) \|\nabla J_\lambda(\theta)\|^2 + \frac{2\mathbb{E} [\|g_\theta(\tau_1)\|^2] + 2 \left\| \frac{\lambda}{|\mathcal{X}|} \left( \frac{\mathbf{1}}{|\mathcal{Y}|} - [\pi_x(\theta)]_{x \in \mathcal{X}} \right) \right\|^2}{m} + d\sigma^2,
\end{aligned}$$

1062 where (a) and (c) hold by definition of  $\nabla J_\lambda(\theta)$ ; (b) holds by definition of  $\tilde{\nabla}_m J(\theta)$ ; (d) holds by  
1063  $(p+q)^2 \leq 2p^2 + 2q^2$ .

1064 In particular, we have

$$\left\| \frac{\lambda}{|\mathcal{X}|} \left( \frac{\mathbf{1}}{|\mathcal{Y}|} - [\pi_x(\theta)]_{x \in \mathcal{X}} \right) \right\|^2 \leq \frac{\lambda^2}{|\mathcal{X}|^2} \left( \frac{|\mathcal{X}||\mathcal{Y}|}{|\mathcal{Y}|^2} - 2\frac{|\mathcal{X}|}{|\mathcal{Y}|} + |\mathcal{X}| \right) = \frac{\lambda^2}{|\mathcal{X}|} \left( 1 - \frac{1}{|\mathcal{Y}|} \right),$$

1065 where the inequality is obtained by using  $\|\pi_x(\theta)\|^2 \leq 1$ .

1066 As for  $\mathbb{E} [\|g_\theta(\tau_1)\|^2]$ , we have

$$\mathbb{E} [\|g_\theta(\tau_1)\|^2] \leq 4R_{\max}^2 G^2 = 4R_{\max}^2 \left( 1 - \frac{1}{|\mathcal{Y}|} \right),$$

1067 where the equality is obtained by Assumption 1 with  $G^2 = \left( 1 - \frac{1}{|\mathcal{Y}|} \right)$ .

1068 Combining above, we proved the gradient estimator  $\tilde{\nabla}_m J_\lambda(\theta)$  satisfies ABC assumption with

$$\mathbb{E} \left[ \left\| \tilde{\nabla}_m J_\lambda(\theta) \right\|^2 \right] \leq \left( 1 - \frac{1}{m} \right) \|\nabla J_\lambda(\theta)\|^2 + \frac{2}{m} \left( 1 - \frac{1}{|\mathcal{Y}|} \right) \left( 4R_{\max}^2 + \frac{\lambda^2}{|\mathcal{X}|} \right) + d\sigma^2,$$

where

$$A = 0, \quad B = 1 - \frac{1}{m}, \quad C = \frac{2}{m} \left( 1 - \frac{1}{|\mathcal{Y}|} \right) \left( 4R_{\max}^2 + \frac{\lambda^2}{|\mathcal{X}|} \right) + d\sigma^2.$$

1069

□

1070 **Lemma 7** (Regularized FOSP Convergence). *Under the learning rate condition  $\eta < \frac{1}{LB}$ , the iterates*  
1071 *satisfy:*

$$\mathbb{E} [\|\nabla J_\lambda(\theta_U)\|^2] \leq \frac{2\delta_1}{\eta T} + LC\eta, \tag{18}$$

1072 where  $B = 1 - 1/m$ ,  $\delta_1 = J^* - J(\theta_1)$ ,  $L = 2R_{\max}(2 - \frac{1}{|\mathcal{Y}|})$ , and  $C$  as defined in Lemma 6.

1073 *Proof.* To proceed with the analysis, we first introduce the following key lemma:

1074 **Lemma 8** (Adapted from Lemma E.3 in Yuan et al. [6]).  $J(\cdot)$  with the softmax tabular policy is  
 1075  $2R_{\max} \left(2 - \frac{1}{|\mathcal{Y}|}\right)$ -smooth and  $2R_{\max} \sqrt{1 - \frac{1}{|\mathcal{Y}|}}$ -Lipschitz.

1076 From Lemma 8, we know that  $J_\lambda(\cdot)$  is smooth and Lipschitz. Then, based on Lemma 5, we have:

$$\mathbb{E} \left[ \|\nabla J_\lambda(\theta_U)\|^2 \right] \leq \frac{2\delta_1}{\eta T(2 - LB\eta)} + \frac{LC\eta}{2 - LB\eta}.$$

1077 Assuming  $\eta < \frac{1}{LB}$ , the above equation simplifies to:

$$\mathbb{E} \left[ \|\nabla J_\lambda(\theta_U)\|^2 \right] \leq \frac{2\delta_1}{\eta T} + LC\eta,$$

1078 where  $B = 1 - 1/m$ ,  $\delta_1 = J^* - J(\theta_1)$ ,  $L = 2R_{\max}(2 - \frac{1}{|\mathcal{Y}|})$ ,  $C = \frac{2}{m} \left(1 - \frac{1}{|\mathcal{Y}|}\right) \left(4R_{\max}^2 + \frac{\lambda^2}{|\mathcal{X}|}\right) +$   
 1079  $d\sigma^2$ ,  $G^2 = 1 - \frac{1}{|\mathcal{Y}|}$  and  $F = 1$ .  $\square$

1080 Note that the sensitivity  $\Delta$  of the gradient estimator  $\tilde{\nabla}_m J_\lambda(\theta)$  is dominated by the data-dependent  
 1081 term. Despite introducing the regularization term  $\lambda$ , this term only depends on the policy parameters  
 1082  $\theta$  (independent of data), thus it does not affect the sensitivity. So the  $\ell_2$ -sensitivity of the gradient  
 1083 remains same as before.

1084 **Lemma 9.** let  $\sigma^2 = \frac{16 \ln(1.25/\delta) \cdot R_{\max}^2 G^2}{m^2 \varepsilon^2}$ , the batch size  $m$  be set as:  $m = (1/\varepsilon)^{2/3} (Nd)^{1/3}$ , and  
 1085  $\eta = \min(\frac{1}{LB}, \frac{\sqrt{2\delta_1}}{\sqrt{TL}C})$ , we have:

$$\mathbb{E} \left[ \|\nabla J_\lambda(\theta_U)\|^2 \right] \leq O \left( \frac{1}{\sqrt{N}} + \left( \frac{\sqrt{d}}{N\varepsilon} \right)^{2/3} \right). \quad (19)$$

1086 *Proof.* for  $\eta = \min(\frac{1}{LB}, \frac{\sqrt{2\delta_1}}{\sqrt{TL}C})$  we know:

$$\mathbb{E} \left[ \|\nabla J_\lambda(\theta_U)\|^2 \right] \leq \frac{2\delta_1 LB}{T} + \frac{2\sqrt{2\delta_1} LC}{\sqrt{T}} = O \left( \frac{1}{T} + \frac{\sqrt{C}}{\sqrt{T}} \right) = O \left( \frac{m}{N} + \frac{1}{\sqrt{N}} + \frac{\sigma \sqrt{md}}{\sqrt{N}} \right).$$

1087 Plug in  $\sigma^2 = \frac{16 \ln(1.25/\delta) \cdot R_{\max}^2 G^2}{m^2 \varepsilon^2}$  and  $m = (1/\varepsilon)^{2/3} (Nd)^{1/3}$ , we have:

$$\mathbb{E} \left[ \|\nabla J_\lambda(\theta_U)\|^2 \right] \leq O \left( \frac{1}{\sqrt{N}} + \left( \frac{\sqrt{d}}{N\varepsilon} \right)^{2/3} \right).$$

1088  $\square$

### 1089 E.3.2 Global optimum convergence

1090 We first introduce an important proposition to bound our global private optimum convergence of  
 1091 softmax with log barrier regularization.

1092 **Proposition 2** (Adapted from Theorem 5.2 in Agarwal et al. [5]). Suppose  $\theta$  is such that  $\|\nabla J_\lambda(\theta)\| \leq$   
 1093  $\frac{\lambda}{2|\mathcal{X}||\mathcal{Y}|}$ . Then for every initial distribution  $\rho$ , we have

$$J^* - J(\theta) \leq 2\lambda. \quad (20)$$

1094 *Proof.* Firstly, we define the following set of “bad” iterates:

$$I^+ \triangleq \left\{ t \in \{1, \dots, T\} \mid \|\nabla J_\lambda(\theta_t)\| \geq \frac{\lambda}{2|\mathcal{X}||\mathcal{Y}|} \right\},$$

1095 with  $\lambda = \frac{\alpha}{2}$ .

1096 From Proposition 2, we know that if  $\|\nabla J_\lambda(\theta)\| \leq \frac{\lambda}{2|\mathcal{X}||\mathcal{Y}|}$ , we have  $J^* - J(\theta) \leq 2\lambda$ .

1097 Hence, we have:

$$\begin{aligned}
J^* - \frac{1}{T} \sum_{t=1}^T J(\theta_t) &= \frac{1}{T} \sum_{t \in I^+} J^* - J(\theta_t) + \frac{1}{T} \sum_{t \notin I^+} J^* - J(\theta_t) \\
&\stackrel{(a)}{\leq} \frac{|I^+|}{T} \cdot 4R_{\max} + \frac{1}{T} \sum_{t \notin I^+} J^* - J(\theta_t) \\
&\stackrel{(20)}{\leq} \frac{|I^+|}{T} \cdot 4R_{\max} + \frac{T - |I^+|}{T} \cdot 2\lambda \\
&\leq \frac{|I^+|}{T} \cdot 4R_{\max} + 2\lambda \\
&\leq \frac{|I^+|}{T} \cdot 4R_{\max} + \alpha,
\end{aligned} \tag{21}$$

1098 where (a) holds by  $J(\cdot) \leq 2R_{\max}$ , then  $J^* - J(\theta_t) \leq J^* + J(\theta_t) \leq 4R_{\max}$ .

1099 Now we turn to bound  $|I^+|$ . From the definition, we have:

$$\sum_{t=1}^T \|\nabla J_\lambda(\theta_t)\|^2 \geq \sum_{t \in I^+} \|\nabla J_\lambda(\theta_t)\|^2 \geq \frac{|I^+|\lambda^2}{4|\mathcal{X}|^2|\mathcal{Y}|^2}.$$

1100 Through a straightforward mathematical transformation, we get

$$\begin{aligned}
\frac{|I^+|}{T} &\leq \frac{4|\mathcal{X}|^2|\mathcal{Y}|^2}{\lambda^2} \cdot \frac{1}{T} \sum_{t=1}^T \|\nabla J_\lambda(\theta_t)\|^2 \\
&= \frac{16}{\alpha^2} \cdot |\mathcal{X}|^2|\mathcal{Y}|^2 \cdot \frac{1}{T} \sum_{t=1}^T \|\nabla J_\lambda(\theta_t)\|^2.
\end{aligned}$$

1101 Thus, we have

$$J^* - \frac{1}{T} \sum_{t=1}^T J(\theta_t) \stackrel{(21)}{\leq} \frac{64R_{\max}}{\alpha^2} |\mathcal{X}|^2|\mathcal{Y}|^2 \cdot \frac{1}{T} \sum_{t=1}^T \|\nabla J_\lambda(\theta_t)\|^2 + \alpha.$$

1102 Taking expectation over the iterations on both sides, we have

$$J^* - \frac{1}{T} \sum_{t=1}^T \mathbb{E}[J(\theta_t)] \leq \frac{64R_{\max}}{\alpha^2} |\mathcal{X}|^2|\mathcal{Y}|^2 \cdot \frac{1}{T} \sum_{t=1}^T \mathbb{E}[\|\nabla J_\lambda(\theta_t)\|^2] + \alpha.$$

1103 To guarantee that  $J^* - \frac{1}{T} \sum_{t=1}^T \mathbb{E}[J(\theta_t)] \leq \alpha$ , we need to show:

$$\frac{1}{T} \sum_{t=1}^T \mathbb{E}[\|\nabla J_\lambda(\theta_t)\|^2] \leq \alpha^3,$$

1104 Obviously, we have:

$$\mathbb{E}[\|\nabla J_\lambda(\theta_U)\|^2] = \frac{1}{T} \sum_{t=1}^T \mathbb{E}[\|\nabla J_\lambda(\theta_t)\|^2].$$

1105 Hence, based on Lemma 9, it is obvious to show that:

$$N \geq O\left(\frac{1}{\alpha^6} + \frac{\sqrt{d}}{\alpha^{9/2}\varepsilon}\right).$$

1106

□

## 1107 **F Proof of Chapter 6**

### 1108 **F.1 Proof of Theorem 4**

1109 For notation simplicity, we let  $\pi_t = \pi_{\theta_t}$ . By performance difference lemma, we have

$$\sum_{t=1}^T J(\pi^*) - J(\pi_t) = \sum_{t=1}^T \mathbb{E}_{x \sim \rho, y \sim \pi^*(\cdot|x)} [A^{\pi_{\theta_t}}(x, y)].$$

1110 Define  $\text{err}_t^* := \mathbb{E}_{x \sim \rho, y \sim \pi^*(\cdot|x)} [(A^{\pi_{\theta_t}}(x, y) - w_t^\top \nabla \log \pi_{\theta_t}(y | x))]$ . Then, we have

$$\begin{aligned} \sum_{t=1}^T J(\pi^*) - J(\pi_t) &= \sum_{t=1}^T \mathbb{E}_{x \sim \rho, y \sim \pi^*(\cdot|x)} [A^{\pi_t}(x, y)] \\ &= \sum_{t=1}^T \mathbb{E}_{x \sim \rho, y \sim \pi^*(\cdot|x)} [\langle w_t, \nabla \log \pi_t(y | x) \rangle] + \sum_{t=1}^T \text{err}_t^* \\ &\stackrel{(a)}{=} \sum_{t=1}^T \mathbb{E}_{x \sim \rho, y \sim \pi^*(\cdot|x)} \left[ \frac{1}{\eta} \langle \theta_{t+1} - \theta_t, \nabla \log \pi_t(y | x) \rangle \right] + \sum_{t=1}^T \text{err}_t^* \\ &\stackrel{(b)}{\leq} \sum_{t=1}^T \mathbb{E}_{x \sim \rho, y \sim \pi^*(\cdot|x)} \left[ \frac{1}{\eta} \log \left( \frac{\pi_{t+1}(y | x)}{\pi_t(y | x)} \right) \right] + \frac{\eta\beta}{2} \|w_t\|^2 + \sum_{t=1}^T \text{err}_t^* \\ &\stackrel{(c)}{\leq} \mathbb{E}_{x \sim \rho, y \sim \pi^*(\cdot|x)} \left[ \frac{1}{\eta} \log \left( \frac{\pi_{T+1}(y | x)}{\pi_1(y | x)} \right) \right] + \frac{T\eta\beta}{2} W^2 + \sum_{t=1}^T \text{err}_t^* \\ &\stackrel{(d)}{\leq} \frac{1}{\eta} \log |\mathcal{Y}| + \frac{T\eta\beta}{2} W^2 + \sum_{t=1}^T \text{err}_t^*, \end{aligned}$$

1111 where (a) holds by the update rule of our algorithm; (b) is true since the  $\beta$ -smooth condition of  
1112  $\log \pi_\theta(y|x)$  is equivalent to the following inequality:

$$\forall \theta, \theta', x, y : \quad |\log \pi_{\theta'}(y | x) - \log \pi_\theta(y | x) - \nabla \log \pi_\theta(y | x) \cdot (\theta' - \theta)| \leq \frac{\beta}{2} \|\theta - \theta'\|_2^2;$$

1113 (c) follows from the Assumption 5, which has a bounded norm of  $W$ , along with telescope sum; (d)  
1114 is true since  $\pi_1$  is a uniform distribution at each state. Thus, dividing by  $T$  on both sides and choosing

1115  $\eta = \sqrt{\frac{2 \log |\mathcal{Y}|}{T\beta W^2}}$ , yields

$$\begin{aligned} J(\pi^*) - \frac{1}{T} \sum_{t=1}^T J(\pi_t) &\leq \frac{\log |\mathcal{Y}|}{\eta T} + \frac{\eta\beta W^2}{2} + \frac{1}{T} \sum_{t=1}^T \text{err}_t^* \\ &\leq \sqrt{\frac{\beta W^2 \log |\mathcal{Y}|}{2T}} + \frac{1}{T} \sum_{t=1}^T \text{err}_t^*. \end{aligned}$$



1116 To bound  $\text{err}_t^*$ , we will simply leverage the guarantee of regression oracle and concentrability  
 1117 coefficient to transfer from  $\mu$  to  $\pi^*$ . In particular, we have for any  $t \in [T]$

$$\begin{aligned} \text{err}_t^* &= \mathbb{E}_{x \sim \rho, y \sim \pi^*(\cdot|x)} \left[ \left( A^{\pi_{\theta_t}}(x, y) - w_t^\top \nabla \log \pi_{\theta_t}(y | x) \right) \right] \\ &\stackrel{(a)}{\leq} \sqrt{\mathbb{E}_{x \sim \rho, y \sim \pi^*(\cdot|x)} \left[ \left( A^{\pi_{\theta_t}}(x, y) - w_t^\top \nabla \log \pi_{\theta_t}(y | x) \right)^2 \right]} \\ &\stackrel{(b)}{\leq} \sqrt{C_{\mu \rightarrow \pi^*} \mathbb{E}_{x \sim \rho, y \sim \mu(\cdot|x)} \left[ \left( A^{\pi_{\theta_t}}(x, y) - w_t^\top \nabla \log \pi_{\theta_t}(y | x) \right)^2 \right]} \\ &\stackrel{(c)}{\leq} \sqrt{C_{\mu \rightarrow \pi^*} \cdot \text{err}_t^2(m, \varepsilon, \delta, \zeta)}, \end{aligned}$$

1118 where (a) holds by Cauchy–Schwarz inequality; in (b), we define the single-policy concentrability  
 1119 coefficient  $C_{\mu \rightarrow \pi^*} := \max_{x, y} \frac{\pi^*(y|x)}{\mu(y|x)}$ ; (c) follows directly from the guarantee of PrivateLS oracle.

1120 Finally, putting everything together, yields

$$J(\pi^*) - \frac{1}{T} \sum_{t=1}^T J(\pi_t) \leq \sqrt{\frac{\beta W^2 \log |\mathcal{Y}|}{2T}} + \frac{\sqrt{C_{\mu \rightarrow \pi^*}}}{T} \sum_{t=1}^T \text{err}_t(m, \varepsilon, \delta, \zeta).$$

## 1121 F2 Proof of Lemma 2

1122 A key lemma in our proof is the following form of Freedman’s inequality.

1123 **Lemma 10** (Lemma A.2 in [72]). *Let  $\{X_i\}_{i \leq n}$  be a real-valued martingale difference sequence  
 1124 adapted to a filtration  $\{\mathcal{F}_i\}_{i \leq n}$ . If  $|X_i| \leq R$  almost surely, then for any  $\eta \in (0, 1/R)$ , with  
 1125 probability at least  $1 - \zeta$ ,*

$$\sum_{i=1}^n X_i \leq \eta \sum_{i=1}^n \mathbb{E}_{i-1}[X_i^2] + \frac{\log(1/\zeta)}{\eta},$$

1126 where  $\mathbb{E}_{i-1}[\cdot] := \mathbb{E}[\cdot | \mathcal{F}_{i-1}]$ .

1127 *Proof of Lemma 2.* For any fixed  $h \in \mathcal{H}$ , we define

$$U_i^h := (h(u_i) - z_i)^2 - (h^*(u_i) - z_i)^2.$$

1128 If we define the filtration  $\mathcal{F}_i = \sigma(u_1, z_1, \dots, u_i, z_i)$  and let  $\mathbb{E}_{i-1}[\cdot] = \mathbb{E}[\cdot | \mathcal{F}_{i-1}]$ , then we have that  
 1129  $\{D_i^h\}_{i \leq m}$  where

$$D_i^h := \mathbb{E}_{i-1}[U_i^h] - U_i^h$$

1130 is a martingale difference sequence adapted to  $\{\mathcal{F}_i\}_{i \leq m}$ . We further notice that

$$\begin{aligned} \mathbb{E}_{i-1}[(D_i^h)^2] &\leq \mathbb{E}_{i-1}[(U_i^h)^2] = \mathbb{E}_{i-1}[(h(u_i) - h^*(u_i))^2 (h(u_i) + h^*(u_i) - 2z_i)^2] \\ &\lesssim R^2 \cdot \mathbb{E}_{i-1}[(h(u_i) - h^*(u_i))^2], \end{aligned}$$

1131 where the last step holds by the boundedness of  $z_i, h \in \mathcal{H}$  and  $h^*$ . Moreover, by definition, we have

$$\begin{aligned} \mathbb{E}_{i-1}[U_i^h] &= \mathbb{E}_{i-1}[(h(u_i) - h^*(u_i))(h(u_i) + h^*(u_i) - 2z_i)] \\ &= \mathbb{E}_{i-1}[(h(u_i) - h^*(u_i))^2]. \end{aligned}$$

1132 With the above results, we first apply Lemma 10 to  $\{D_i^h\}_{i \leq m}$  along with a union bound, yielding  
 1133 that with probability at least  $1 - \zeta$ , for all  $h \in \mathcal{H}$

$$\sum_{i=1}^m \mathbb{E}_{i-1}[(h(u_i) - h^*(u_i))^2] \lesssim \sum_{i=1}^m U_i^h + R^2 \cdot \log(|\mathcal{H}|/\zeta). \quad (22)$$

1134 Similarly, we can apply Lemma 10 to  $\{-D_i^h\}_{i \leq m}$  along with a union bound, which give us

$$\sum_{i=1}^m U_i^h \lesssim \sum_{i=1}^m \mathbb{E}_{i-1}[(h(u_i) - h^*(u_i))^2] + \log(|\mathcal{H}|/\zeta). \quad (23)$$

Now, we set  $h = \hat{h}$  in (22), i.e., the output of the exponential mechanism, and by the standard utility guarantee of the exponential mechanism [33], we have

$$\sum_{i=1}^m \mathbb{E}_{i-1}[(\hat{h}(u_i) - h^*(u_i))^2] \lesssim \sum_{i=1}^m U_t^{h'} + R^2 \log(|\mathcal{H}|/\zeta) + R^2 \frac{\log(|\mathcal{H}|/\zeta)}{\varepsilon},$$

where  $h' \in \arg \min_{h \in \mathcal{H}} L(h) = \arg \min_{h \in \mathcal{H}} \sum_{i \in [m]} (h(u_i) - z_i)^2$ . Since  $\sum_{i=1}^m U_i^{h'} \leq \sum_{i=1}^m U_i^{\tilde{h}}$  where  $\tilde{h} := \arg \min_{h \in \mathcal{H}} \sum_{i=1}^m \mathbb{E}_{i-1}[(h(u_i) - h^*(u_i))^2]$ , by (23) and the above inequality, we have

$$\begin{aligned} \sum_{i=1}^m \mathbb{E}_{i-1}[(\hat{h}(u_i) - h^*(u_i))^2] &\lesssim \sum_{i=1}^m \mathbb{E}_{i-1}[(\tilde{h}(u_i) - h^*(u_i))^2] + R^2 \log(|\mathcal{H}|/\zeta) + R^2 \frac{\log(|\mathcal{H}|/\zeta)}{\varepsilon} \\ &\stackrel{(a)}{\leq} m\alpha_{\text{approx}} + R^2 \log(|\mathcal{H}|/\zeta) + R^2 \frac{\log(|\mathcal{H}|/\zeta)}{\varepsilon}, \end{aligned}$$

where (a) holds the assumption on the approximation error.  $\square$

## G Proof of Appendix D

**Lemma 11.** Consider any  $t \in [T]$ . For notation simplicity, we define  $f_t(x, y) := \frac{1}{\eta} \ln \frac{\pi_{t+1}(y|x)}{\pi_t(y|x)}$ . Define  $\Delta(x, y) = f_t(x, y) - r(x, y)$ . Define  $\Delta_{\pi_t}(x) = \mathbb{E}_{y \sim \pi_t(\cdot|x)} \Delta(x, y)$  and  $\Delta_{\mu}(x) = \mathbb{E}_{y \sim \mu(\cdot|x)} \Delta(x, y)$ . Under Assumption 6, for all  $t$ , we have the following:

$$\begin{aligned} \mathbb{E}_{x, y \sim \pi_t(\cdot|x)} (f_t(x, y) - r(x, y) - \Delta_{\pi_t}(x))^2 &\leq \text{err}_t^2(m, \varepsilon, \delta, \zeta), \\ \mathbb{E}_{x, y \sim \mu(\cdot|x)} (f_t(x, y) - r(x, y) - \Delta_{\mu}(x))^2 &\leq \text{err}_t^2(m, \varepsilon, \delta, \zeta), \\ \mathbb{E}_x (\Delta_{\pi_t}(x) - \Delta_{\mu}(x))^2 &\leq \text{err}_t^2(m, \varepsilon, \delta, \zeta). \end{aligned}$$

*Proof.* From Assumption 6, we have:

$$\begin{aligned} &\mathbb{E}_{x, y_1 \sim \pi_t, y_2 \sim \mu} \left[ (f_t(x, y_1) - r(x, y_1) - \Delta_{\pi_t}(x)) - (f_t(x, y_2) - r(x, y_2) - \Delta_{\mu}(x)) + \Delta_{\pi_t}(x) - \Delta_{\mu}(x) \right]^2 \\ &= \mathbb{E}_{x, y_1 \sim \pi_t} (f_t(x, y_1) - r(x, y_1) - \Delta_{\pi_t}(x))^2 + \mathbb{E}_{x, y_2 \sim \mu} (f_t(x, y_2) - r(x, y_2) - \Delta_{\mu}(x))^2 \\ &\quad - 2 \mathbb{E}_{x, y_1 \sim \pi_t, y_2 \sim \mu} (f_t(x, y_1) - r(x, y_1) - \Delta_{\pi_t}(x)) (f_t(x, y_2) - r(x, y_2) - \Delta_{\mu}(x)) \\ &\quad + 2 \mathbb{E}_{x, y_1 \sim \pi_t} (f_t(x, y_1) - r(x, y_1) - \Delta_{\pi_t}(x)) (\Delta_{\pi_t}(x) - \Delta_{\mu}(x)) \\ &\quad - 2 \mathbb{E}_{x, y_2 \sim \mu} (f_t(x, y_2) - r(x, y_2) - \Delta_{\mu}(x)) (\Delta_{\pi_t}(x) - \Delta_{\mu}(x)) \\ &\quad + \mathbb{E}_x (\Delta_{\pi_t}(x) - \Delta_{\mu}(x))^2 \\ &= \mathbb{E}_{x, y_1 \sim \pi_t} (f_t(x, y_1) - r(x, y_1) - \Delta_{\pi_t}(x))^2 + \mathbb{E}_{x, y_2 \sim \mu} (f_t(x, y_2) - r(x, y_2) - \Delta_{\mu}(x))^2 \\ &\quad + \mathbb{E}_x (\Delta_{\pi_t}(x) - \Delta_{\mu}(x))^2 \\ &\leq \text{err}_t^2(m, \varepsilon, \delta, \zeta). \end{aligned}$$

In that case, since the total sum is less than  $\text{err}_t^2(m, \varepsilon, \delta, \zeta)$ , it follows that each term must be less than  $\text{err}_t^2(m, \varepsilon, \delta, \zeta)$ . Hence, the lemma holds.  $\square$

**Lemma 12.** Assume  $\max_{x, y, t} |A_t(x, y)| \leq A \in \mathbb{R}^+$ , and  $\pi_1$  is uniform over  $\mathcal{Y}$ . Then with  $\eta = \sqrt{\ln(|\mathcal{Y}|)/(A^2 T)}$ , for the sequence of policies computed by REBEL, we have:

$$\forall \pi, x : \sum_{t=1}^T \mathbb{E}_{y \sim \pi(\cdot|x)} A_t(x, y) \leq 2A \sqrt{\ln(|\mathcal{Y}|)T}.$$

1149 *Proof.* By the definition of  $f_t$ , we have

$$\Delta(x, y) = \frac{1}{\eta} \ln \frac{\pi_{t+1}(y|x)}{\pi_t(y|x)} - r(x, y).$$

1150 Taking exp on both sides, we get:

$$\forall x, y : \quad \pi_{t+1}(y|x) = \pi_t(y|x) \exp(\eta(r(x, y) + \Delta(x, y))) = \frac{\pi_t(y|x) \exp(\eta(r(x, y) + \Delta(x, y) - \Delta_\mu(x)))}{\exp(-\eta\Delta_\mu(x))}.$$

1151 Denote

$$g_t(x, y) := r(x, y) + \Delta(x, y) - \Delta_\mu(x),$$

1152 and the advantage

$$A_t(x, y) = g_t(x, y) - \mathbb{E}_{y' \sim \pi_t(\cdot|x)} g_t(x, y').$$

1153 We can rewrite the above update rule as:

$$\forall x, y : \quad \pi_{t+1}(y|x) \propto \pi_t(y|x) \exp(\eta A_t(x, y))$$

1154 The remain part of the proof is similar to the analysis of NPG in F.1. □

### 1155 G.1 Proof of Theorem 6

1156 *Proof.* We know that:

$$\frac{1}{T} \sum_{t=1}^T (\mathbb{E}_{x, y \sim \pi^*(\cdot|x)} r(x, y) - \mathbb{E}_{x, y \sim \pi_t(\cdot|x)} r(x, y)) = \frac{1}{T} \sum_{t=1}^T \mathbb{E}_{x, y \sim \pi^*(\cdot|x)} (A^{\pi_t}(x, y)).$$

1157 Then, we have:

$$\begin{aligned} \frac{1}{T} \sum_{t=1}^T \mathbb{E}_{x, y \sim \pi^*(\cdot|x)} (A^{\pi_t}(x, y)) &= \frac{1}{T} \sum_{t=1}^T \mathbb{E}_{x, y \sim \pi^*(\cdot|x)} (A_t(x, y)) \\ &\quad + \frac{1}{T} \sum_{t=1}^T \mathbb{E}_{x, y \sim \pi^*(\cdot|x)} (A^{\pi_t}(x, y) - A_t(x, y)) \\ &\stackrel{(a)}{\leq} 2A \sqrt{\frac{\ln(|\mathcal{Y}|)}{T}} \\ &\quad + \frac{1}{T} \sum_{t=1}^T \sqrt{\mathbb{E}_x \mathbb{E}_{y \sim \pi^*(\cdot|x)} (A^{\pi_t}(x, y) - A_t(x, y))^2}, \end{aligned}$$

1158 where (a) holds by Lemma 12.

1159 Then we need to bound:  $\mathbb{E}_x \mathbb{E}_{y \sim \pi^*(\cdot|x)} (A^{\pi_t}(x, y) - A_t(x, y))^2$ .

1160 By the definition of concentrability coefficient  $C_{\mu \rightarrow \pi^*}$ , we know that:

$$\mathbb{E}_x \mathbb{E}_{y \sim \pi^*(\cdot|x)} (A^{\pi_t}(x, y) - A_t(x, y))^2 \leq C_{\mu \rightarrow \pi^*} \mathbb{E}_{x, y \sim \mu(\cdot|x)} (A^{\pi_t}(x, y) - A_t(x, y))^2$$

1161 We now bound  $\mathbb{E}_{x, y \sim \mu(\cdot|x)} (A^{\pi_t}(x, y) - A_t(x, y))^2$ .

$$\begin{aligned} &\mathbb{E}_{x, y \sim \mu(\cdot|x)} (A^{\pi_t}(x, y) - A_t(x, y))^2 \\ &= \mathbb{E}_{x, y \sim \mu(\cdot|x)} (r(x, y) - \mathbb{E}_{y' \sim \pi_t(\cdot|x)} r(x, y') - g_t(x, y) + \mathbb{E}_{y' \sim \pi_t(\cdot|x)} g_t(x, y'))^2 \\ &\leq 2\mathbb{E}_{x, y \sim \mu(\cdot|x)} (r(x, y) - g_t(x, y))^2 + 2\mathbb{E}_x \mathbb{E}_{y' \sim \pi_t(\cdot|x)} (r(x, y') - g_t(x, y'))^2 \end{aligned}$$

1162 Recall the  $g_t(x, y) = r(x, y) + \Delta(x, y) - \Delta_\mu(x)$ , and from Lemma 11, we can see that

$$\mathbb{E}_{x, y \sim \mu(\cdot|x)} (r(x, y) - g_t(x, y))^2 = \mathbb{E}_{x, y \sim \mu(\cdot|x)} (\Delta(x, y) - \Delta_\mu(x))^2 \leq \text{err}_t^2(m, \varepsilon, \delta, \zeta).$$

1163 For  $\mathbb{E}_x \mathbb{E}_{y' \sim \pi_t(\cdot|x)} (r(x, y') - g_t(x, y'))^2$ , we have:

$$\begin{aligned} \mathbb{E}_x \mathbb{E}_{y' \sim \pi_t(\cdot|x)} (r(x, y') - g_t(x, y'))^2 &= \mathbb{E}_x \mathbb{E}_{y' \sim \pi_t(\cdot|x)} (\Delta(x, y') - \Delta_\mu(x))^2 \\ &= \mathbb{E}_x \mathbb{E}_{y' \sim \pi_t(\cdot|x)} (\Delta(x, y') - \Delta_{\pi_t}(x) + \Delta_{\pi_t}(x) - \Delta_\mu(x))^2 \\ &\leq 2\mathbb{E}_x \mathbb{E}_{y' \sim \pi_t(\cdot|x)} (\Delta(x, y') - \Delta_{\pi_t}(x))^2 + 2\mathbb{E}_x (\Delta_{\pi_t}(x) - \Delta_\mu(x))^2 \\ &\leq 4\text{err}_t^2(m, \varepsilon, \delta, \zeta), \end{aligned}$$

1164 where the last inequality uses Lemma 11 again.

1165 Combine things together, we can conclude that:

$$\mathbb{E}_x \mathbb{E}_{y \sim \pi^*(\cdot|x)} (A^{\pi_t}(x, y) - A_t(x, y))^2 \leq C_{\mu \rightarrow \pi^*} (10\text{err}_t^2(m, \varepsilon, \delta, \zeta)).$$

1166 Hence, we can derive our main theorem:

$$\begin{aligned} \frac{1}{T} \sum_{t=1}^T \mathbb{E}_{x, y \sim \pi^*(\cdot|x)} (A^{\pi_t}(x, y)) &\leq 2A \sqrt{\frac{\ln |\mathcal{Y}|}{T}} + \frac{1}{T} \sum_t \sqrt{10C_{\mu \rightarrow \pi^*} \text{err}_t^2(m, \varepsilon, \delta, \zeta)} \\ &= 2A \sqrt{\frac{\ln |\mathcal{Y}|}{T}} + \frac{\sqrt{10C_{\mu \rightarrow \pi^*}}}{T} \sum_{t=1}^T \text{err}_t(m, \varepsilon, \delta, \zeta). \end{aligned}$$

1167 □

## 1168 H Limitations

1169 In this study, we propose private variants of three classical algorithms for policy optimization and  
 1170 provide a comprehensive analysis of their sampling complexity under both private and non-private  
 1171 settings. Our analysis successfully recovers the classical complexity bounds in the non-private regime,  
 1172 validating the theoretical soundness of our approach. However, our current results focus only on the  
 1173 one-pass sampling setting; the sampling complexity in the multi-pass scenario may admit further  
 1174 improvements.

1175 Moreover, this work primarily centers on the theoretical foundations of the proposed algorithms,  
 1176 and we have not yet conducted empirical evaluations. Nevertheless, since our methods serve as  
 1177 core components in policy optimization, they have broad applicability across various reinforcement  
 1178 learning domains—particularly in privacy-sensitive settings such as reinforcement learning with  
 1179 human feedback (RLHF) and medical data analysis. Applying our approach to these areas could  
 1180 further enhance the secure handling of sensitive information.
